# Supplementary material
Source: publisher figshare collection journal article supplement (https://gsajournals.figshare.com/articles/dataset/_/13323035)

**File S2. Plots of mean-variance relationships between allele copy number for each active TE family.** As in Figures 4D-E, each dot reflects the observed mean and variance of the copy number of the major (blue) and minor (gold) alleles of positions with  $>0.1$  sequence diversity. For reference, the shaded regions are re-plotted from Figure 3B.

# Dispersion plots

August 18, 2020

<Figure size 432x288 with 0 Axes>

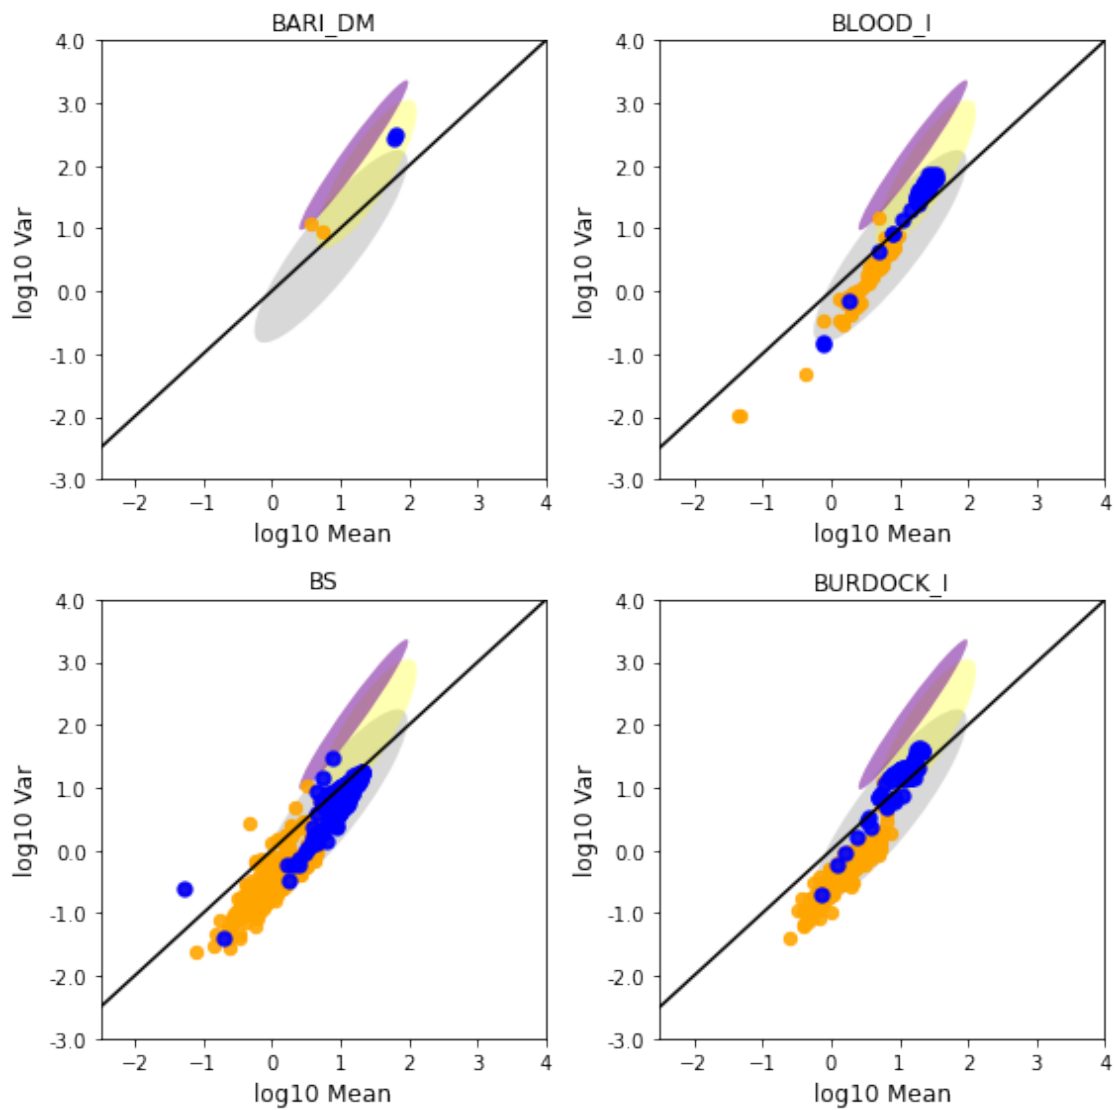

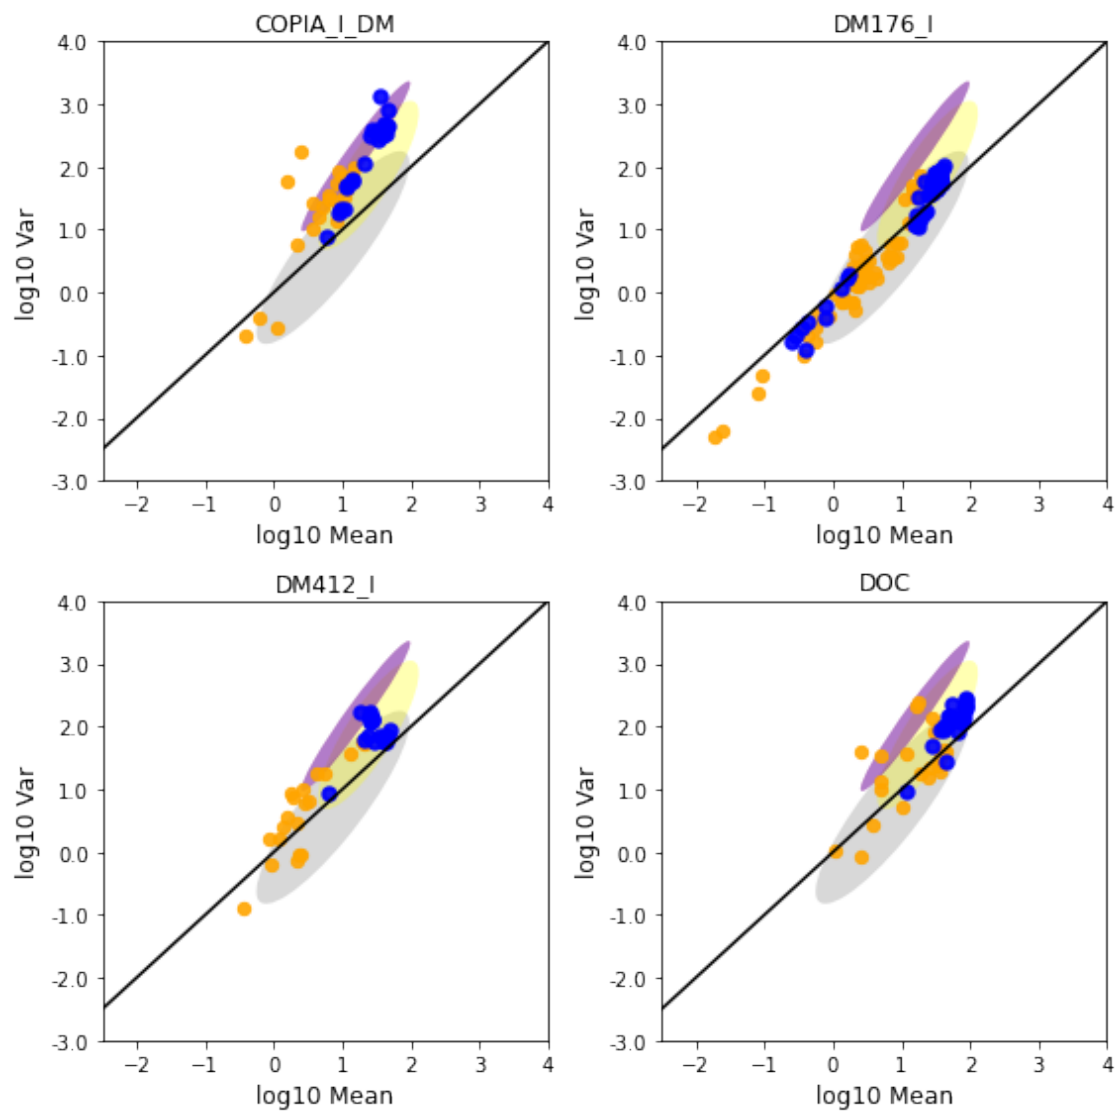

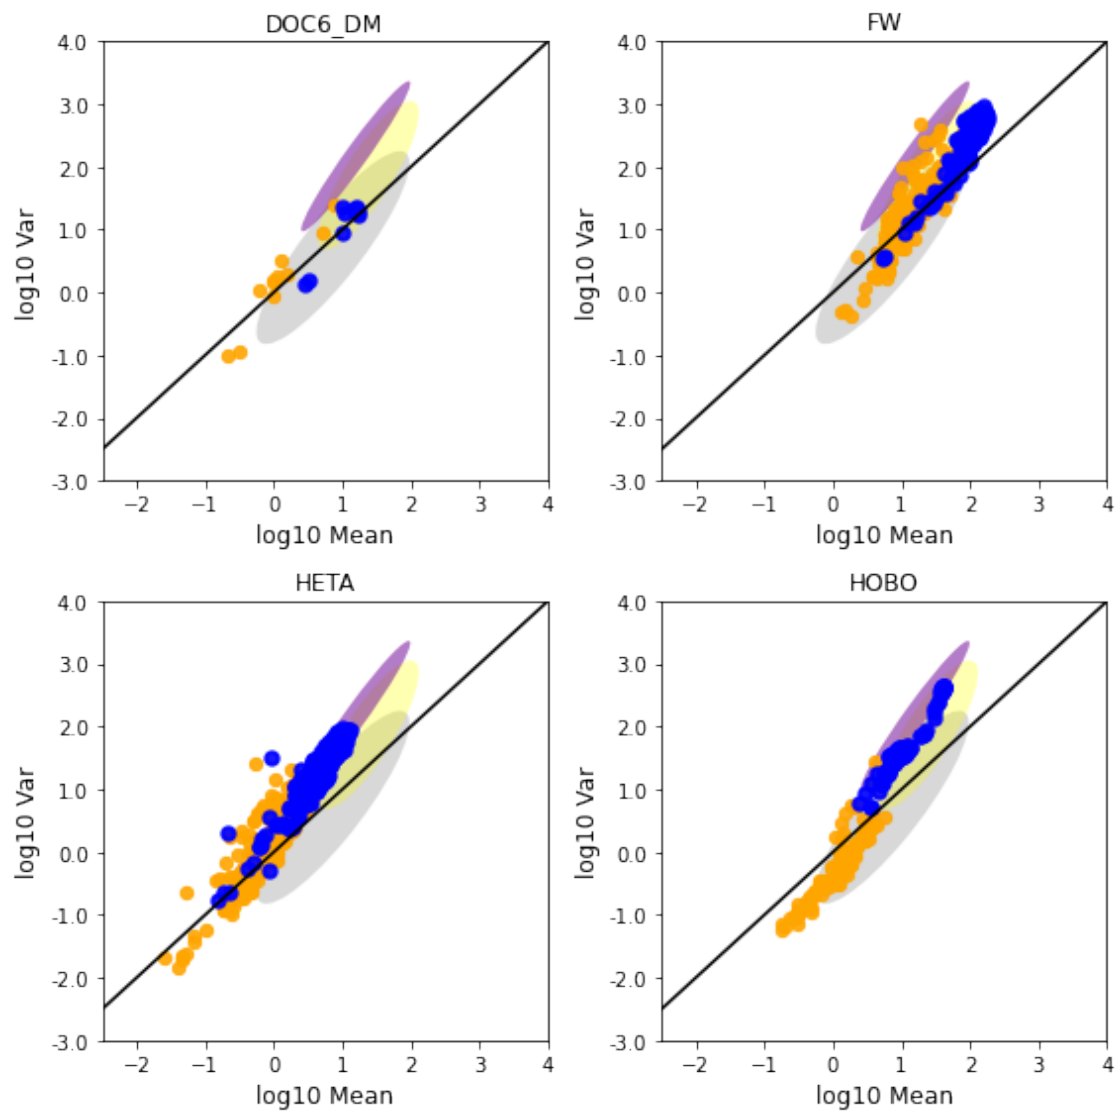

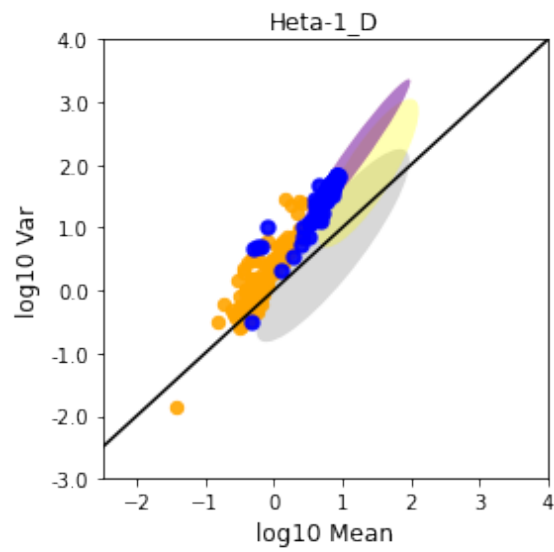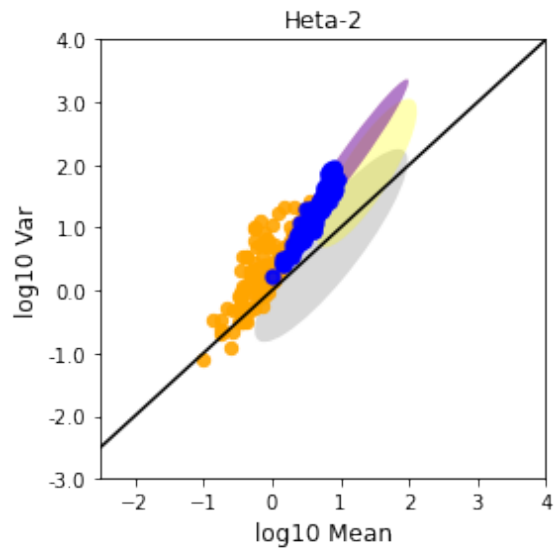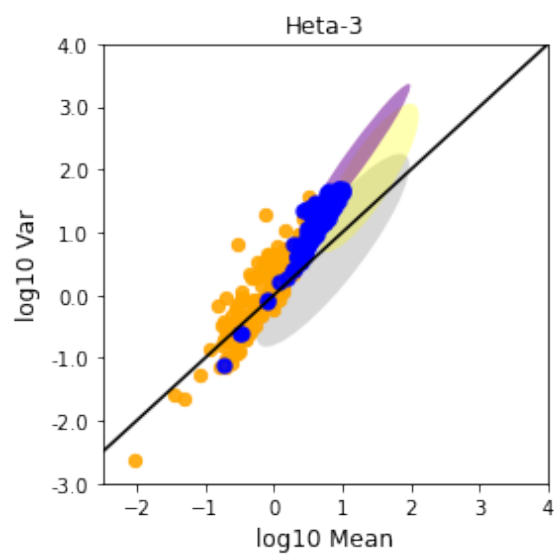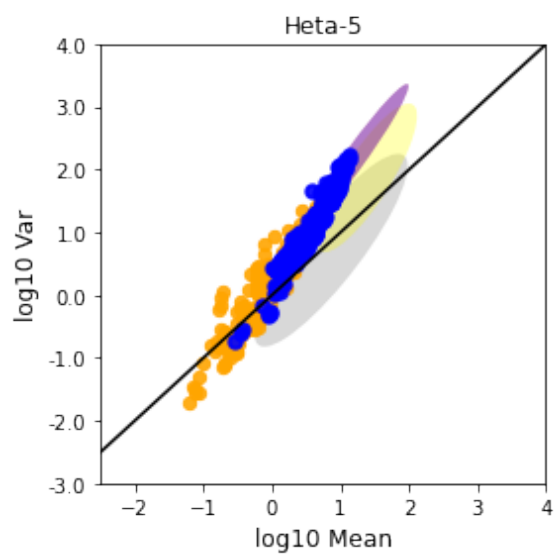

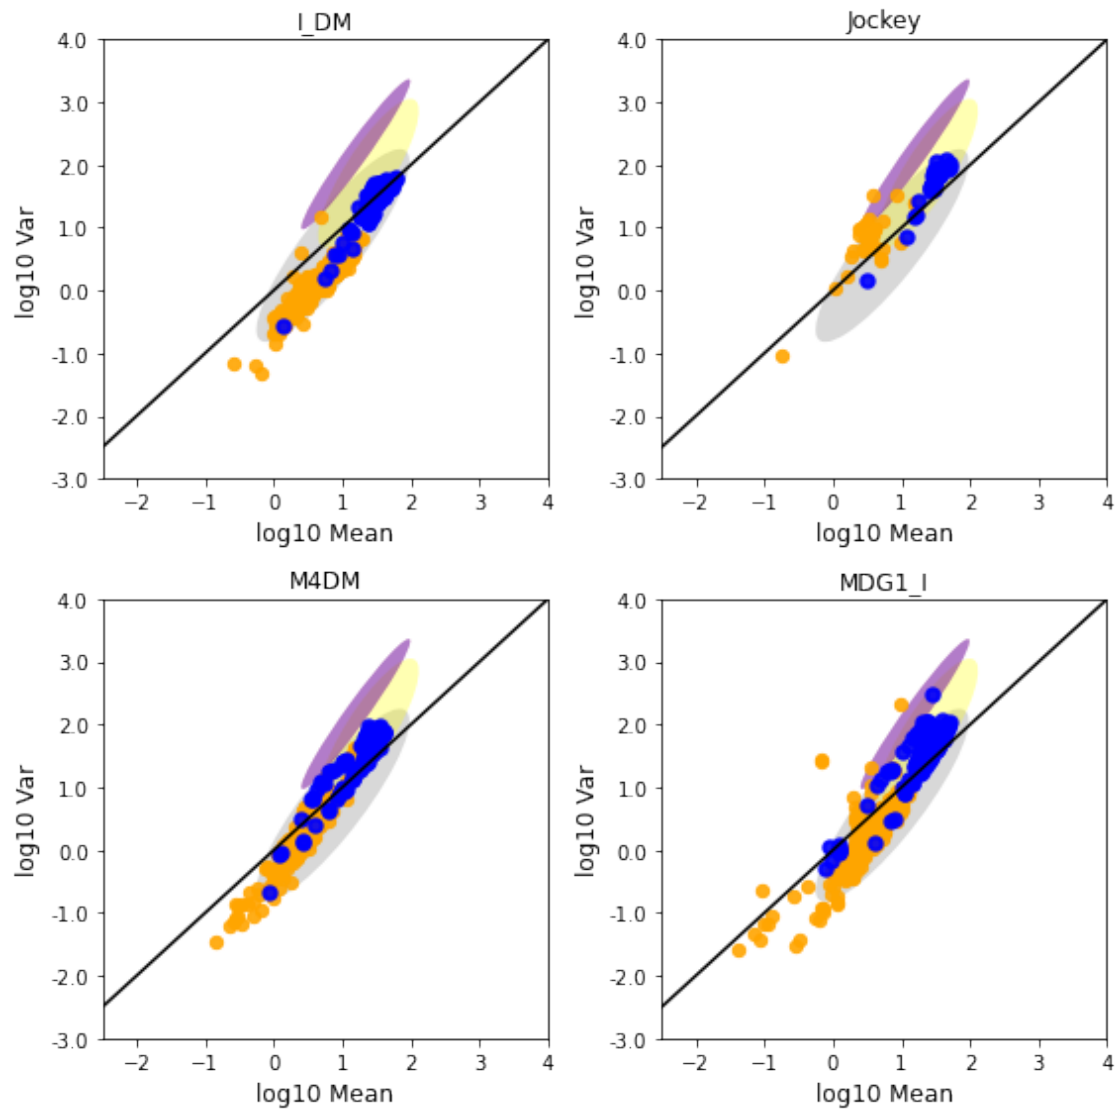

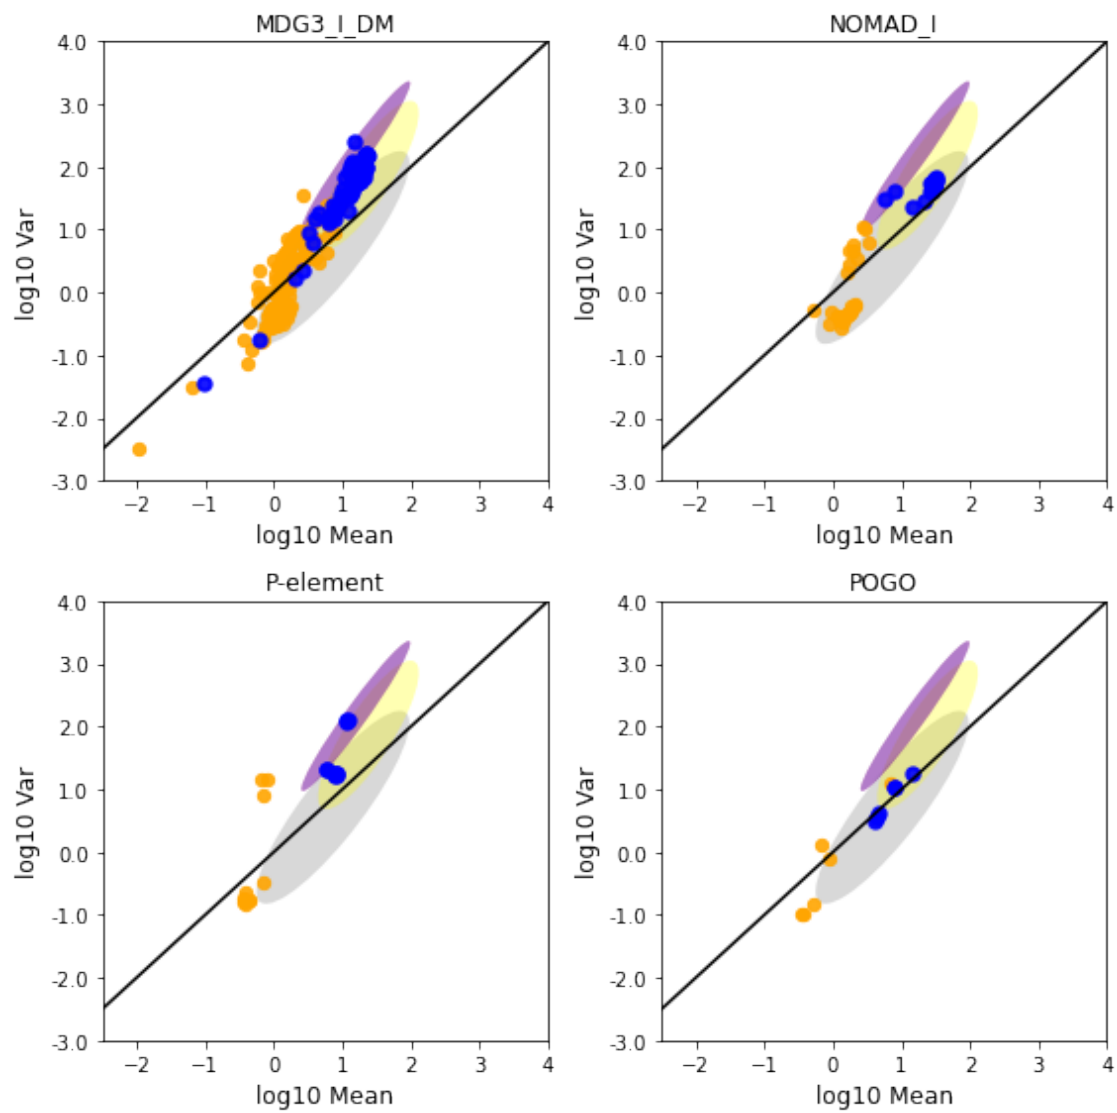

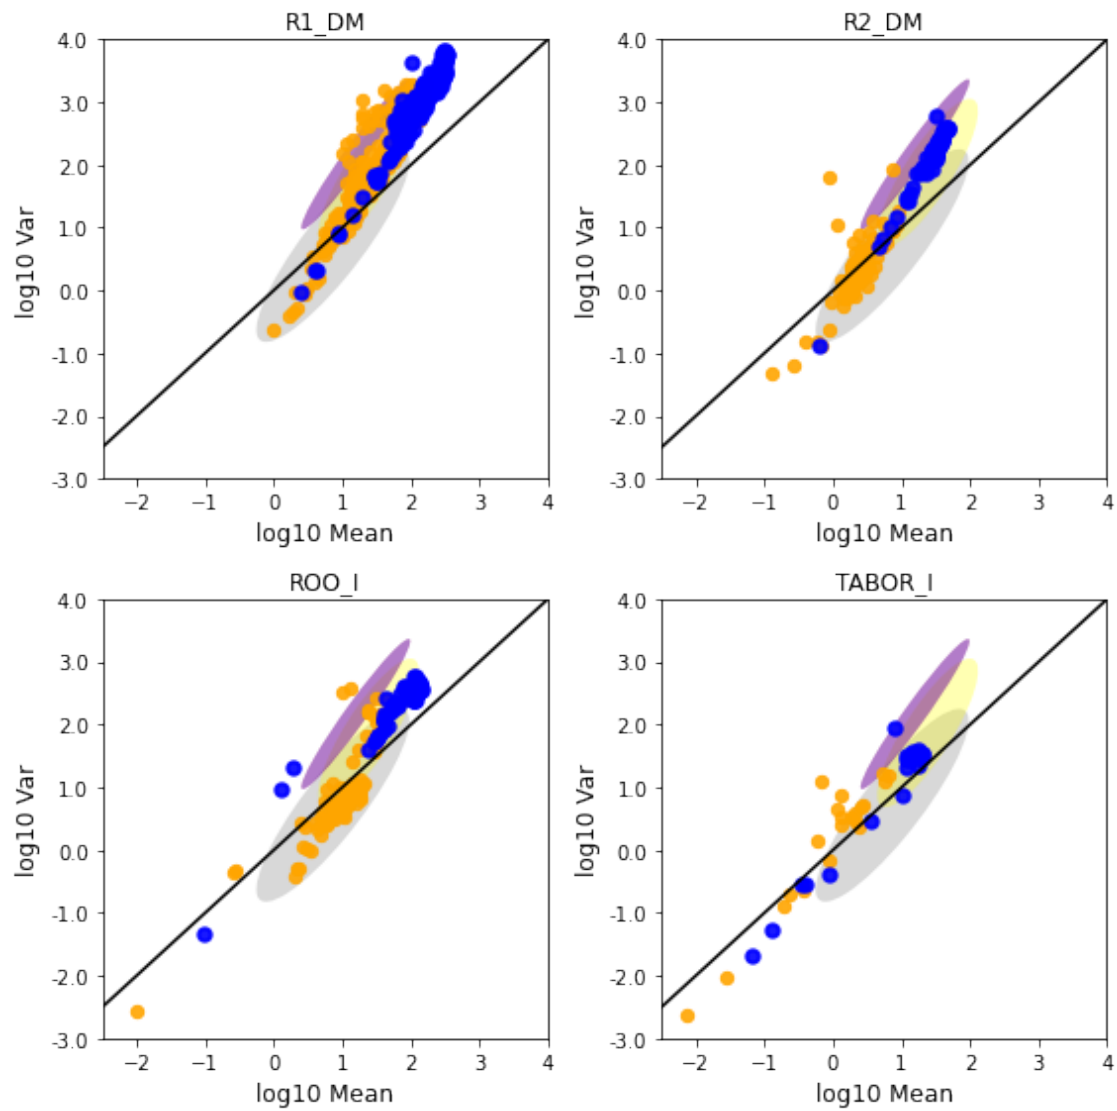



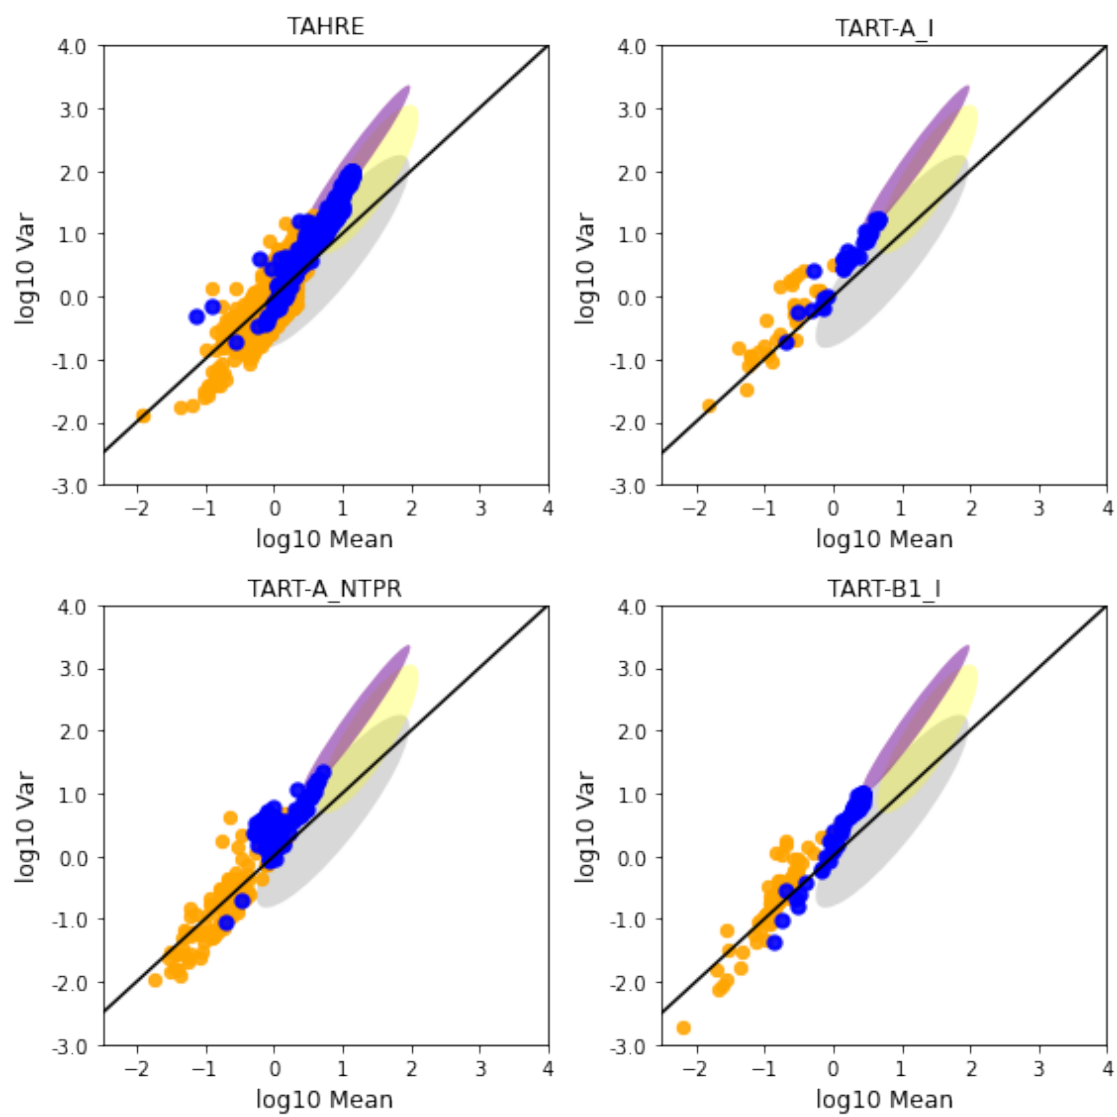

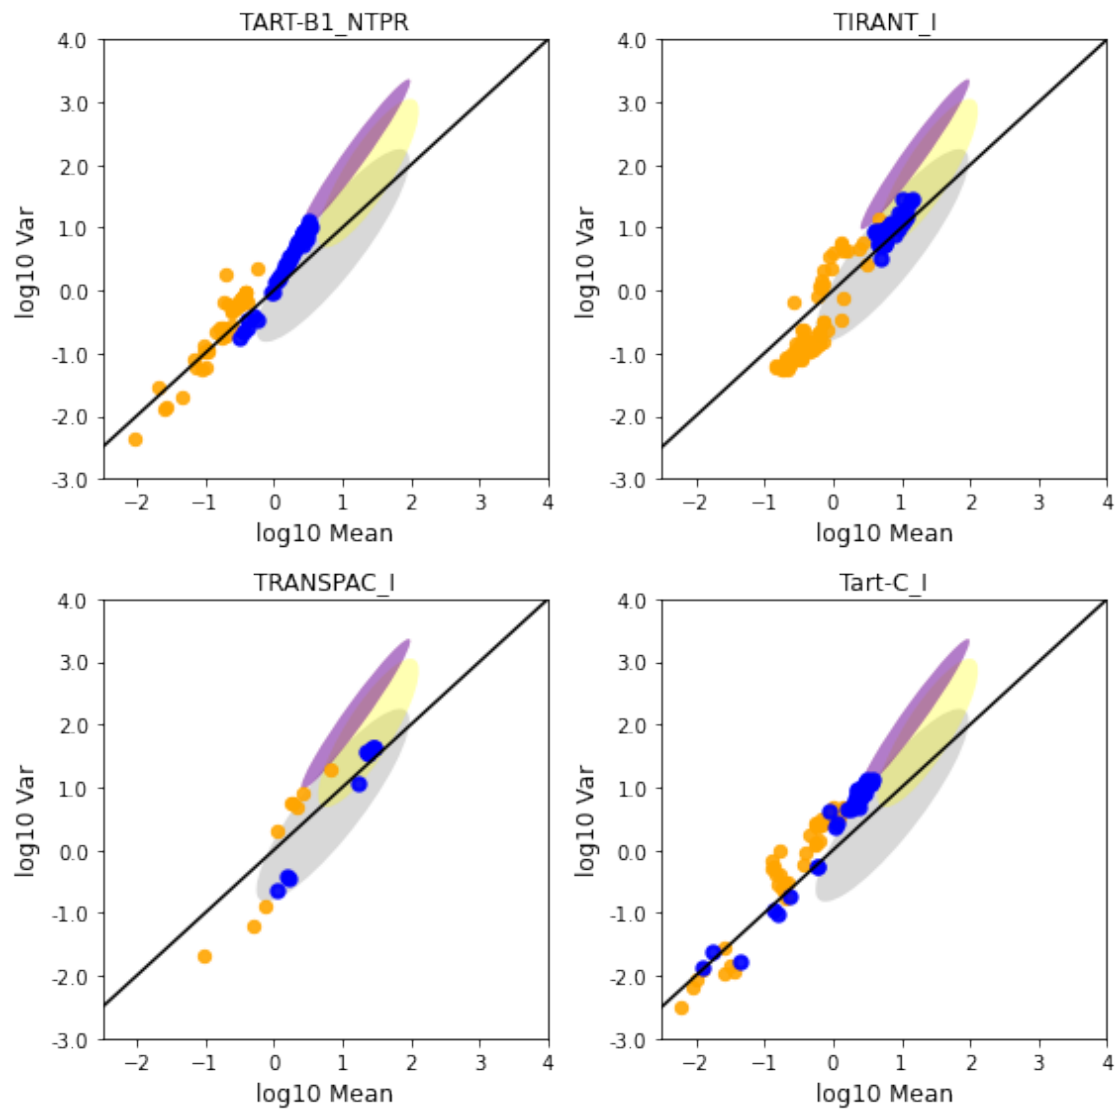

Supplement: Supplementary file 1 [file 2]
