# Supplementary material
Source: publisher figshare collection journal article supplement (https://gsajournals.figshare.com/articles/dataset/_/13323035)
Supplement: Supplementary file 1 [file 2]

## Sheet: Sheet1
Table S2: TE copy number per strain.
	ACCORD_LTR	BAGGINS1	BARI_DM	BATUMI_LTR	BEL_LTR	Bica_LTR	BLASTOPIA_LTR	BLOOD_LTR	BS	BS2	BS3_DM	BURDOCK_LTR	Chimpo_LTR	Chouto_LTR	COPIA_LTR_DM	Copia1_LTR_DM	COPIA2_LTR_DM	DIVER_LTR	DIVER2_LTR	DM1731_LTR	DM176_LTR	DM297_LTR	DM412_LTR	DMCR1A	DMRT1A	DMRT1B	DMRT1C	DMTOM1_LTR	DNAREP1_DM	DOC	DOC2_DM	DOC3_DM	DOC4_DM	DOC5_DM	DOC6_DM	FB4_DM	FROGGER_LTR	FW	FW2_DM	FW3_DM	G_DM	G2_DM	G3_DM	G4_DM	G5_DM	G5A_DM	G6_DM	G7_DM	GTWIN_LTR
B04	8	43	15	4	7	3	19	11	29	35	13	17	3	6	18	1	2	5	14	2	7	37	23	141	22	46	20	4	536	32	8	31	17	19	30	65	1	45	5	8	3	10	10	24	16	27	4	1	2
B05	7	48	13	1	7	3	18	18	35	34	12	20	2	5	31	2	3	12	16	2	14	47	29	156	35	38	14	3	553	41	9	31	20	19	19	57	1	62	6	5	4	14	7	31	18	29	7	2	2
B10	7	45	12	2	7	1	21	13	27	40	12	20	3	5	12	1	3	5	16	2	15	46	29	155	24	38	17	7	555	35	9	31	19	25	36	66	2	65	5	8	2	7	5	25	16	28	6	2	0
B11	6	51	11	2	7	3	16	18	34	37	14	22	3	5	33	2	3	9	15	2	14	45	39	146	30	39	23	8	498	43	11	28	16	23	39	58	1	64	6	6	1	15	5	27	16	26	5	2	3
B12	5	47	16	4	2	2	15	14	29	32	16	22	3	4	17	1	4	3	15	3	10	32	33	171	26	41	17	8	555	47	10	32	15	23	27	66	2	61	4	7	4	9	6	28	14	30	7	2	1
B14	9	50	17	4	10	2	18	20	26	38	14	19	2	5	24	1	1	8	14	3	14	33	21	141	26	41	13	6	506	32	7	30	14	21	47	60	1	61	7	7	5	12	3	25	14	29	6	0	2
B23	4	43	15	4	9	2	21	22	31	29	13	24	3	5	27	1	0	10	14	2	17	37	32	146	32	45	16	5	453	40	7	33	12	18	38	53	0	74	5	5	2	17	4	30	13	27	6	2	2
B28	6	43	13	1	2	2	18	12	23	28	13	20	3	5	21	1	2	8	15	2	12	44	23	131	25	42	15	5	386	35	8	24	16	19	26	56	1	58	4	5	3	11	6	23	15	25	4	1	1
B38	9	47	18	3	8	3	13	24	30	37	12	18	4	5	27	1	1	11	16	3	15	52	26	153	28	41	17	6	512	38	10	26	16	22	28	54	1	56	4	6	3	11	5	28	16	27	4	2	1
B42	8	49	16	2	2	1	17	16	37	36	15	19	2	5	27	1	2	4	14	1	16	36	39	137	24	46	19	6	503	45	7	26	21	21	23	53	1	79	5	7	2	12	5	26	12	27	9	2	1
B43	3	47	20	2	7	3	15	16	35	26	16	20	2	4	24	1	3	10	16	4	10	42	29	149	30	43	20	6	506	57	8	30	18	22	34	61	0	72	5	5	3	10	3	21	15	27	5	2	0
B51	5	48	16	2	8	2	12	14	32	37	17	18	5	5	25	1	2	2	13	2	12	38	28	147	33	40	20	6	466	44	8	29	19	23	26	57	0	70	3	7	5	12	6	20	13	29	7	1	2
B52	7	48	17	3	7	2	16	13	32	35	15	21	2	4	24	2	2	5	13	3	15	40	34	146	27	53	17	5	483	53	6	29	18	20	31	56	1	55	5	7	4	7	2	26	15	30	4	1	1
B54	6	56	18	4	7	2	21	25	33	34	12	21	3	5	35	1	3	9	15	3	13	40	25	149	25	50	20	9	582	34	9	30	16	20	37	67	1	64	5	7	6	9	8	29	15	27	5	2	2
B59	6	43	20	2	11	2	18	18	39	28	13	22	2	5	34	1	3	8	16	3	17	53	30	150	25	32	12	6	582	45	7	29	15	24	53	68	1	92	4	4	2	11	5	26	13	33	6	2	2
I01	3	52	9	2	5	2	13	49	41	35	16	22	3	4	146	1	3	4	14	2	17	50	19	154	31	42	21	6	592	51	8	31	17	22	19	62	1	79	4	8	4	21	5	27	15	28	7	2	7
I02	4	47	8	1	7	1	20	16	27	37	14	10	3	4	21	1	4	3	17	4	14	59	20	176	24	36	22	5	625	41	7	27	17	22	19	61	2	60	3	7	3	11	5	31	14	32	4	1	2
I03	6	45	4	3	4	3	25	12	35	38	12	18	4	4	21	1	2	2	13	3	21	50	25	165	35	40	17	7	606	61	10	30	18	21	21	64	1	74	5	4	4	14	6	27	14	27	4	1	4
I04	5	48	7	1	4	1	8	14	23	36	11	21	3	5	18	0	2	2	16	3	14	50	35	133	21	32	15	7	457	48	10	30	15	25	10	50	1	58	4	8	1	16	6	28	18	26	5	0	2
I06	3	44	5	2	3	2	12	20	33	28	14	16	5	4	19	1	4	2	10	3	18	46	38	146	24	34	12	6	555	35	7	22	16	22	15	64	1	65	4	3	0	15	5	25	16	29	4	2	3
I07	3	49	7	3	7	1	17	16	31	30	11	14	5	5	17	1	2	4	16	3	11	34	15	141	28	35	17	6	523	47	7	25	17	23	13	50	1	55	5	9	2	9	5	26	13	31	5	1	3
I13	4	50	9	2	8	2	16	15	32	34	13	14	4	5	19	2	3	5	15	3	15	59	25	171	28	39	19	9	618	53	9	30	18	23	14	61	1	69	4	7	3	8	7	30	15	31	4	2	3
I16	5	42	5	3	8	1	7	14	25	27	13	12	4	5	15	1	3	1	13	3	10	47	19	158	25	27	15	7	561	54	9	31	14	22	20	69	2	49	3	6	1	14	6	27	14	29	5	2	3
I17	6	54	5	4	9	1	10	16	31	43	17	11	3	5	55	1	3	2	14	2	17	43	30	162	26	45	21	7	621	45	9	31	21	22	16	63	1	62	6	6	6	12	7	30	16	28	6	2	4
I22	4	55	8	3	6	3	10	25	22	35	15	13	4	5	23	1	2	2	13	2	11	43	36	147	31	37	19	7	561	51	8	26	17	24	24	52	1	67	4	7	3	16	6	27	14	31	4	1	2
I23	2	54	8	1	10	1	24	31	34	37	14	13	4	5	20	1	2	3	16	2	16	45	35	158	33	47	15	7	587	102	8	26	15	25	22	59	1	64	5	8	4	19	4	30	16	31	5	2	2
I24	7	49	6	2	41	3	17	14	19	29	14	18	4	6	19	1	2	3	15	4	13	40	32	152	27	40	19	7	513	34	12	28	17	20	23	58	1	73	4	7	4	15	5	26	17	31	6	2	1
I26	3	50	10	1	11	2	12	16	37	37	13	24	6	4	18	1	1	5	11	1	13	46	26	155	25	34	14	5	534	44	10	24	14	21	19	62	2	63	4	6	5	19	5	28	17	28	5	2	2
I29	7	52	7	2	5	3	12	15	36	34	14	13	5	4	62	1	1	6	13	2	9	40	37	157	29	47	15	6	580	68	10	30	18	20	15	60	1	51	4	7	3	11	6	30	16	30	5	1	3
I31	4	43	5	3	4	1	11	12	25	27	13	14	3	4	13	1	1	1	15	3	10	37	20	136	27	33	17	7	475	28	10	30	16	21	17	48	0	56	4	5	3	12	6	23	14	24	4	1	2
I33	3	45	4	3	6	1	6	14	23	33	11	13	2	5	18	2	1	1	16	3	14	36	21	130	41	33	18	5	452	38	11	25	14	18	16	46	1	49	3	9	5	14	5	25	12	26	5	1	3
I34	5	44	3	3	6	3	11	7	15	32	12	9	3	4	17	1	2	3	13	2	15	30	25	146	25	38	17	7	472	34	8	25	14	16	8	52	1	67	5	4	4	11	4	27	13	31	3	2	1
I35	7	42	8	2	5	1	14	17	24	29	11	23	4	6	18	1	2	3	13	2	15	43	27	147	30	40	17	5	477	37	8	30	16	19	12	50	1	53	4	3	2	13	4	26	15	27	4	1	3
I38	4	51	3	2	5	3	8	10	24	37	12	9	3	4	18	1	4	2	14	2	7	41	20	150	24	37	21	7	505	36	8	29	18	20	14	53	1	66	5	6	5	10	5	26	15	29	5	2	2
N01	5	36	5	2	1	0	15	8	29	26	10	14	3	5	14	1	3	7	11	2	12	37	27	127	20	29	10	5	396	34	8	21	13	15	8	49	0	61	4	4	0	4	4	22	13	22	5	2	1
N02	6	43	4	1	5	2	18	25	20	31	13	11	4	4	25	1	2	5	10	2	15	47	27	130	27	34	11	6	417	45	8	23	14	19	13	51	1	54	4	3	2	8	3	25	12	31	3	1	4
N03	4	39	8	0	4	1	15	21	22	29	14	13	4	3	30	2	2	4	14	1	10	22	34	130	25	33	11	6	370	48	7	23	12	16	12	53	2	53	3	4	3	8	4	21	10	27	4	1	1
N04	6	38	8	2	3	2	11	9	22	26	8	7	2	5	18	2	2	1	7	0	12	39	24	103	28	28	11	3	324	35	6	22	10	20	9	52	1	53	4	5	2	9	5	19	11	22	7	2	3
N07	4	38	4	3	8	1	12	19	23	30	11	19	6	5	24	0	2	7	10	3	14	42	26	120	26	28	13	5	343	35	8	25	9	16	16	50	2	54	4	4	1	8	4	22	12	30	3	1	3
N10	3	41	6	3	11	3	17	12	29	26	12	11	3	5	15	1	2	9	7	1	11	30	31	124	19	32	12	3	381	49	7	23	14	16	16	48	2	63	6	4	4	10	3	20	11	24	3	1	2
N11	5	37	4	0	6	0	17	27	27	33	12	16	3	5	24	1	4	5	10	2	15	48	36	109	23	36	9	5	319	55	11	17	12	12	13	51	1	68	4	5	3	4	3	22	10	21	5	0	3
N13	3	38	4	3	34	0	16	24	31	29	10	18	1	4	142	0	3	5	9	2	16	43	40	120	31	25	12	4	327	40	6	21	9	16	24	45	0	70	3	4	3	11	2	24	13	25	7	0	1
N14	5	40	6	0	9	1	14	17	21	30	9	17	3	5	47	1	3	8	10	1	13	43	25	119	25	31	12	5	347	44	10	26	11	16	20	50	1	54	3	6	2	12	6	23	14	25	7	0	1
N15	4	37	4	3	2	1	18	11	27	35	8	8	3	5	18	2	1	4	14	1	11	34	27	129	22	38	15	7	372	38	6	18	15	15	15	50	2	48	5	2	4	8	2	20	13	23	5	1	2
N16	3	38	4	1	9	1	19	13	17	29	12	16	2	4	26	1	3	10	11	0	19	40	24	125	26	37	11	5	331	50	6	25	10	19	10	42	1	46	4	7	1	9	3	19	10	22	2	0	3
N17	5	46	8	1	8	2	16	29	27	28	13	17	4	6	40	1	1	6	13	1	15	48	30	150	30	41	18	6	469	51	9	29	15	20	16	55	0	77	3	4	4	10	7	27	13	28	4	2	2
N18	5	31	3	1	3	1	20	18	21	29	9	10	2	4	20	2	0	1	10	2	15	45	32	107	21	23	12	4	313	37	8	22	11	17	15	46	0	48	3	2	1	7	4	18	9	24	3	1	2
N19	5	43	4	1	4	1	12	18	17	29	9	14	2	4	11	2	2	5	9	1	15	34	34	111	17	34	11	6	362	41	8	24	10	17	21	54	0	56	4	5	3	8	3	25	12	17	3	2	1
N22	5	31	4	2	9	2	14	20	18	29	14	16	0	4	18	1	1	6	9	3	9	36	33	93	24	22	8	4	308	44	9	20	11	16	11	44	1	39	4	3	1	10	3	22	10	22	3	0	2
N23	2	38	4	1	9	0	12	17	27	24	9	12	3	4	14	0	1	4	9	4	16	44	31	106	20	28	10	4	318	34	7	23	13	17	13	46	1	55	4	4	4	11	4	23	11	20	6	1	0
N25	4	39	8	1	3	1	13	20	22	28	9	14	4	5	17	2	0	4	15	3	15	44	31	120	21	31	13	7	347	45	9	23	14	16	14	56	2	69	3	4	4	15	4	25	14	26	4	0	2
N29	3	46	3	1	7	1	20	16	26	29	14	12	4	4	17	1	1	6	16	2	12	40	32	139	21	41	13	5	438	38	6	21	16	20	14	45	0	55	3	5	4	10	2	22	12	27	6	2	3
N30	4	45	6	2	3	1	17	20	18	28	13	13	3	4	41	2	2	6	12	2	16	39	35	113	27	31	11	4	349	39	8	21	7	15	21	50	0	46	4	2	2	10	2	22	10	25	5	1	3
T01	5	33	8	1	3	0	11	10	27	28	10	10	3	4	26	1	2	3	12	0	5	34	21	99	22	28	9	6	324	44	7	26	12	15	12	46	2	37	3	1	1	10	4	20	12	22	4	1	1
T04	6	43	4	2	6	2	13	18	26	35	11	14	3	4	27	1	3	7	11	2	7	42	32	124	15	23	13	4	393	37	6	19	14	17	15	53	1	49	3	3	3	10	6	21	11	21	10	1	9
T05	3	43	5	2	5	0	5	14	27	35	13	13	3	4	17	1	2	2	9	2	8	36	29	130	24	38	10	6	413	21	7	22	13	18	9	62	1	48	4	6	4	6	2	20	13	27	6	2	3
T07	7	35	7	0	3	0	10	22	28	30	12	7	4	4	20	0	2	1	10	3	17	37	24	119	19	28	11	5	374	38	7	24	12	15	13	58	1	43	4	2	3	13	6	22	12	27	5	1	4
T09	3	41	6	3	6	0	15	11	23	29	11	12	4	4	28	0	2	3	10	2	13	35	22	124	16	31	13	5	374	41	8	23	9	16	13	44	1	50	3	3	4	16	5	21	10	21	5	1	1
T10	4	38	6	1	9	0	15	11	19	29	11	13	2	5	20	1	2	3	11	2	16	38	18	127	16	30	12	3	344	35	8	19	9	15	12	48	1	61	3	4	0	16	4	22	9	24	3	1	1
T14A	3	42	8	3	2	1	17	8	14	34	11	13	1	4	16	2	2	2	15	1	17	40	37	127	26	27	15	6	383	35	6	25	12	21	13	55	2	59	4	5	2	14	5	26	9	27	3	2	1
T22A	4	45	5	1	8	1	9	11	22	28	13	11	3	4	19	0	2	3	11	3	13	38	19	128	24	34	18	6	424	39	7	27	13	15	15	53	1	39	4	4	2	11	5	27	11	28	6	0	1
T23	0	37	4	1	7	0	15	18	23	29	13	9	3	4	12	0	0	5	9	3	15	37	38	124	26	38	11	5	349	37	9	22	10	16	14	48	0	48	4	4	2	6	6	26	8	23	3	2	3
T24	6	40	4	0	5	1	11	14	22	28	8	11	3	4	18	1	0	2	10	2	16	35	24	109	14	27	8	3	322	50	5	17	7	11	17	47	2	35	4	1	2	13	3	20	12	24	7	0	1
T25A	4	39	5	2	4	1	16	11	24	35	9	16	4	4	20	0	3	3	9	1	10	31	31	108	14	20	7	5	321	38	8	25	10	18	12	44	2	40	3	5	4	13	5	26	11	24	5	1	2
T29A	3	43	6	1	4	1	13	14	17	28	12	8	4	4	23	1	2	6	12	2	12	27	12	120	18	26	12	4	356	44	8	22	9	19	7	47	1	40	1	4	8	16	5	22	12	26	8	2	2
T30A	6	39	5	1	6	1	8	24	29	30	12	12	1	4	21	1	1	5	14	2	14	37	21	127	20	33	10	7	409	43	9	25	14	17	17	57	2	48	3	6	2	19	7	23	11	27	6	2	1
T35	4	39	7	2	6	1	13	18	31	30	13	14	3	3	25	1	3	2	10	2	9	36	16	127	21	24	9	5	352	50	7	23	11	19	18	56	1	51	3	2	2	18	4	21	14	26	3	1	2
T36B	3	39	6	2	5	2	14	13	31	27	11	16	1	4	20	2	4	2	13	2	17	48	34	122	20	40	13	4	405	48	9	26	10	13	16	48	1	74	3	3	2	16	4	25	14	29	7	2	2
T39	5	41	4	1	4	0	7	11	20	25	9	9	4	4	14	1	3	6	12	1	9	34	33	128	15	34	9	6	380	40	11	25	10	17	14	56	2	44	3	4	1	15	4	24	15	26	7	1	2
T43A	9	41	4	2	4	0	20	13	28	30	9	12	1	5	13	2	2	3	10	2	9	43	21	124	19	26	9	5	361	37	6	22	16	18	16	54	1	51	3	6	2	13	4	19	11	26	4	1	0
T45B	8	39	4	2	4	1	13	12	24	29	8	10	2	4	19	0	2	6	9	1	10	39	13	113	14	31	10	3	281	43	7	28	10	17	13	42	2	59	5	1	1	14	4	23	10	22	4	0	1
ZH23	8	42	4	3	9	1	9	18	22	27	10	11	2	5	15	1	3	6	13	5	10	36	36	111	18	20	10	4	334	25	6	22	11	14	12	48	1	50	4	5	5	15	5	24	13	20	3	2	0
ZH26	3	39	7	2	15	1	27	22	26	29	12	13	2	6	21	1	3	4	10	4	9	65	30	129	24	27	9	6	365	32	6	24	8	16	18	49	1	57	3	6	5	16	6	21	12	25	14	1	1
ZH33	3	42	8	3	8	0	7	21	10	19	8	14	3	5	20	1	1	5	8	3	7	26	24	87	26	21	10	2	280	31	5	23	12	10	9	35	0	29	4	3	5	13	4	24	10	24	5	1	1
ZH42	5	43	4	1	5	1	10	23	17	19	9	6	1	4	15	2	1	4	8	2	6	31	40	105	18	23	10	3	340	22	5	18	11	13	8	39	1	32	4	3	1	23	3	23	12	21	1	0	2
ZS10	6	40	9	1	7	2	8	19	18	16	10	7	2	5	14	2	0	4	11	2	5	29	38	98	17	20	11	5	316	23	5	21	15	13	8	45	1	36	3	3	3	16	4	19	10	19	3	1	2
ZW09	7	48	6	3	12	3	10	25	22	34	15	12	7	4	15	3	3	4	11	3	4	45	41	149	18	31	18	6	527	32	7	31	19	18	18	51	0	42	4	8	3	18	6	29	13	26	7	2	2
ZW139	5	50	9	2	9	2	17	21	30	26	15	13	4	4	18	1	2	4	11	2	5	29	38	145	19	30	16	5	514	33	6	33	19	19	11	49	1	43	3	7	3	19	6	25	14	29	7	1	1
ZW140	6	49	6	3	8	2	14	15	24	33	8	7	3	5	13	3	1	7	13	7	5	39	32	142	22	28	18	4	515	36	9	29	16	19	13	71	1	26	4	8	4	16	6	24	16	33	6	1	2
ZW142	3	44	8	2	4	1	12	21	30	38	14	14	3	6	17	1	2	4	13	2	5	28	25	147	18	27	17	5	529	32	7	29	21	22	6	52	1	37	4	5	4	16	6	27	17	29	8	1	0
ZW144	5	40	6	2	3	0	3	19	14	20	9	12	2	6	16	0	0	2	9	3	6	33	27	100	17	19	11	2	310	15	6	22	14	13	5	35	1	22	3	3	3	8	3	18	12	22	5	0	0
ZW155	1	41	5	1	3	2	7	14	16	27	12	6	3	5	17	1	2	4	8	2	2	24	23	119	17	28	9	6	305	22	7	22	10	15	11	43	0	29	2	6	2	16	5	23	10	21	2	0	1
ZW177	3	44	9	3	7	2	9	22	15	29	9	6	2	4	14	1	1	5	12	4	6	26	22	122	14	23	11	4	383	22	7	22	17	19	13	53	1	30	4	6	3	15	4	28	12	21	6	0	1
ZW184	5	36	9	1	4	1	12	17	13	24	10	12	2	4	21	1	1	3	11	1	14	32	26	116	26	31	9	6	339	36	7	20	12	15	9	50	1	41	5	4	2	12	5	20	11	26	4	1	1
ZW185	8	43	6	1	7	2	8	20	19	28	6	11	2	5	14	1	0	2	7	5	4	26	28	115	15	27	12	5	346	24	7	23	16	13	11	42	0	46	3	7	6	8	3	21	12	23	10	1	2
The estimated copy number of each TE family in the 85 GDL strains.
[truncated: 71 more columns]
