# Supplementary material
Source: publisher figshare collection journal article supplement (https://gsajournals.figshare.com/articles/dataset/_/13323035)
Supplement: Supplementary file 3 [file 2]

**File S3. Visualization of read coverage on chromosomes with evidence for terminal**

**deficiencies.** Each blue dot is the estimated copy number at a given position, determined as the ratio between the observed and expected read depth. The black lines below the plots indicate which regions of the reference are repeat-masked (and should show little or no read coverage). The orange trendlines are a 10 kb rolling window average of estimated copy number and the red lines indicate the average copy number estimate to the left and right of the inferred deficiency breakpoint. The vertical red line in some plots indicates the location of the HTT-subtelomere junction. Below each plot we note the breakpoint coordinate we estimated based on read depth as well as the percent of the coverage prior to the breakpoint remaining in the deleted regions, from which we infer the heterozygosity or homozygosity of the deficiency.

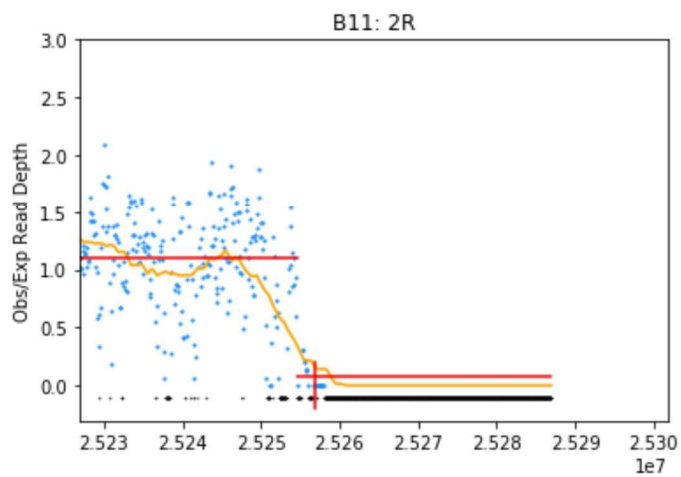

Breakpoint 25254536; Remaining coverage after breakpoint 6.55%

---

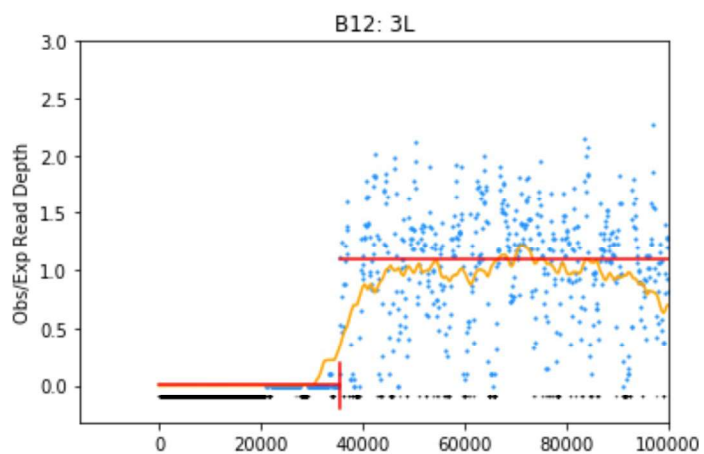

Breakpoint 35500; Remaining coverage after breakpoint 0.81%

---

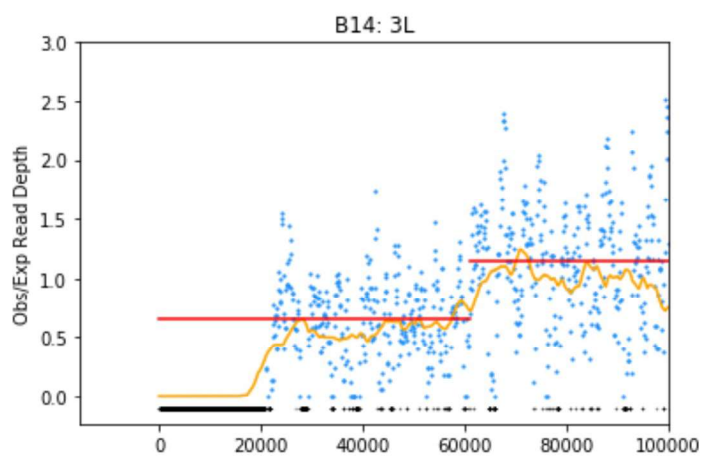

Breakpoint 61000; Remaining coverage after breakpoint 57.25%

---

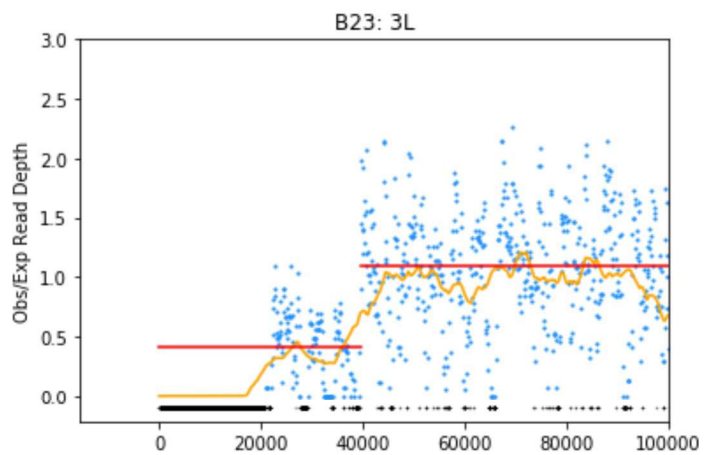

Breakpoint 39500; Remaining coverage after breakpoint 38.07%

---

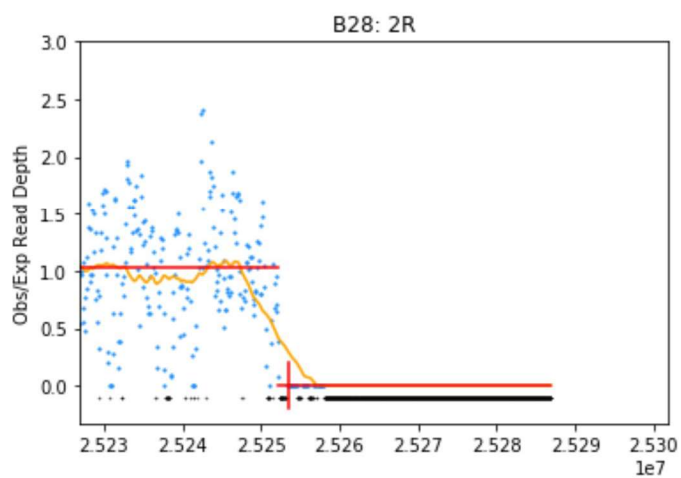

Breakpoint 25252136; Remaining coverage after breakpoint 0.23%

---

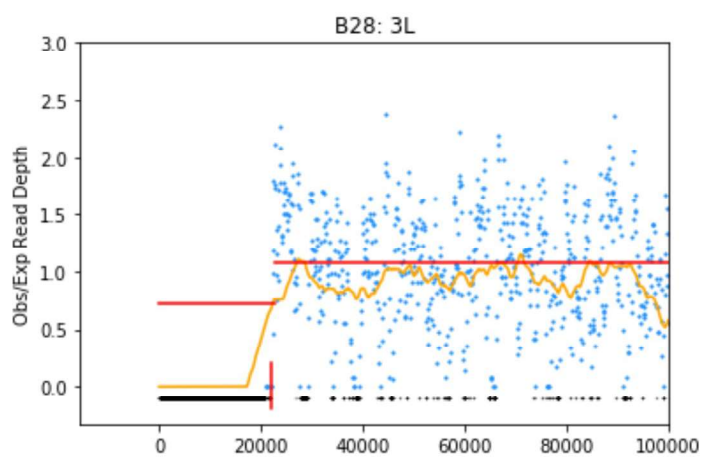

Breakpoint 22700; Remaining coverage after breakpoint 67.11%

---

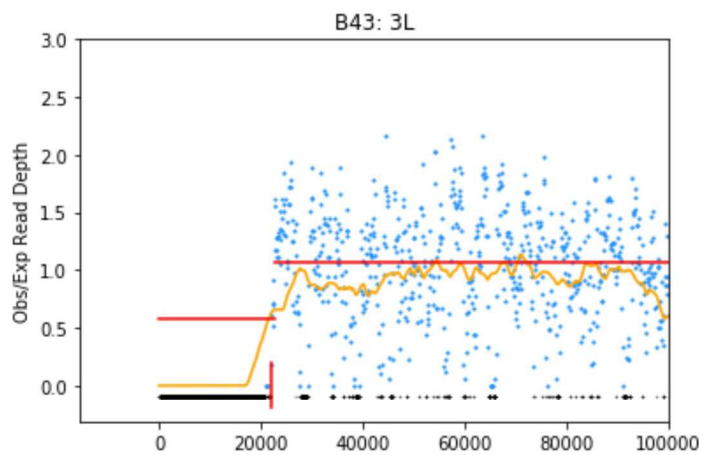

Breakpoint 22700; Remaining coverage after breakpoint 54.31%

---

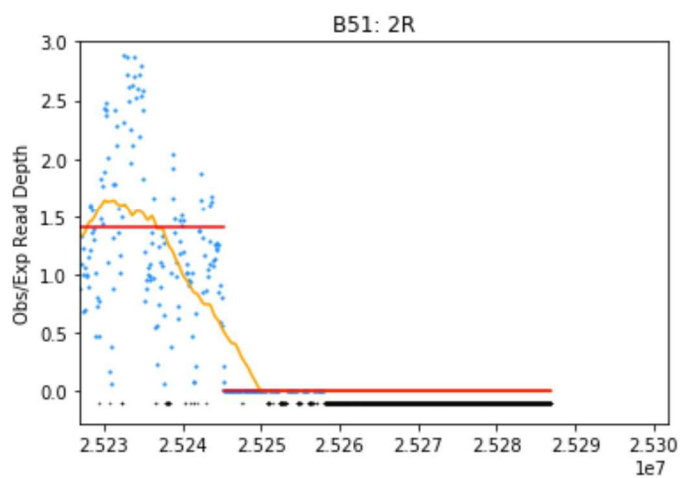

Breakpoint 25245136; Remaining coverage after breakpoint 0.05%

---

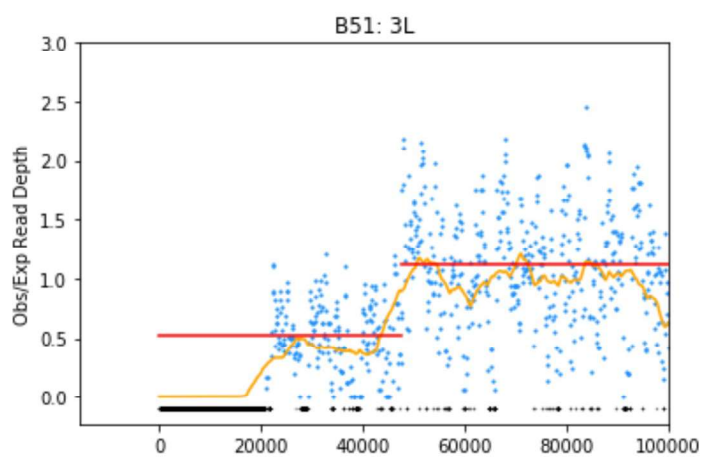

Breakpoint 47700; Remaining coverage after breakpoint 47.11%

---

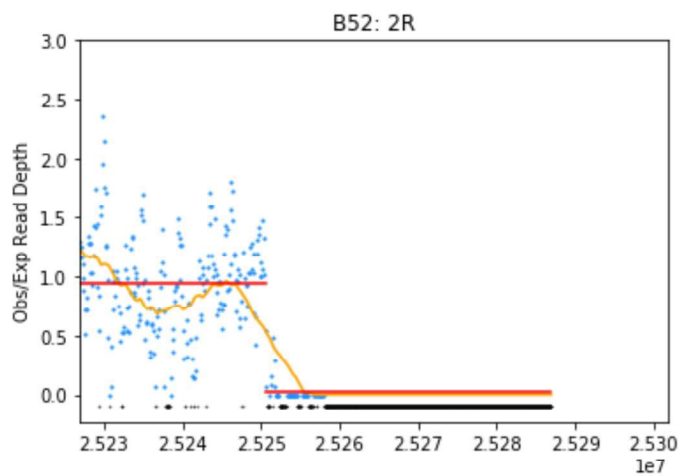

Breakpoint 25250636; Remaining coverage after breakpoint 2.60%

---

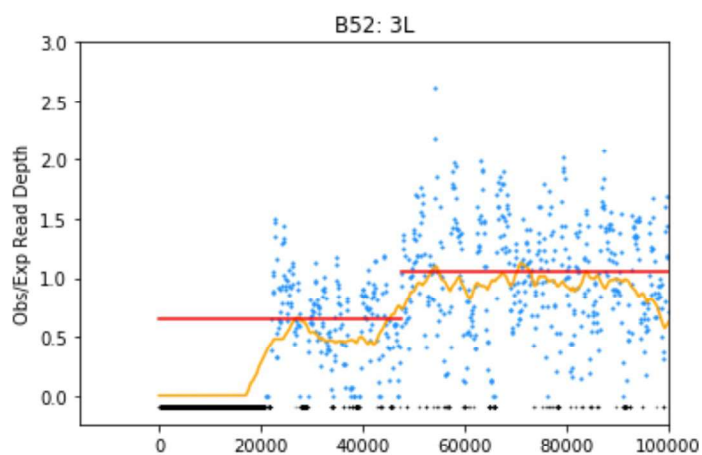

Breakpoint 47600; Remaining coverage after breakpoint 61.14%

---

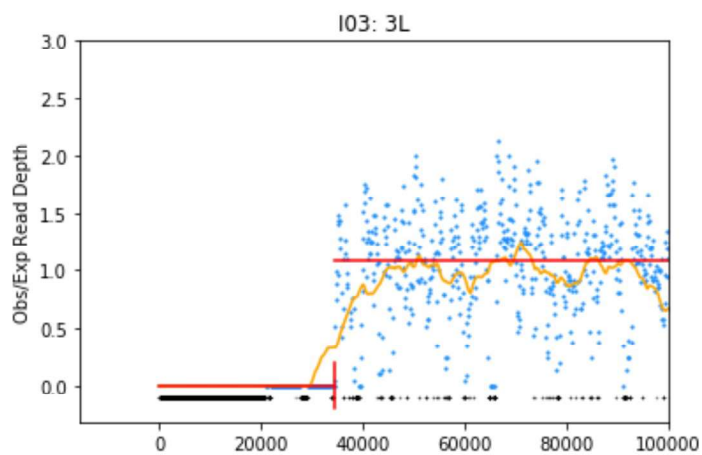

Breakpoint 34600; Remaining coverage after breakpoint 0.48%

---

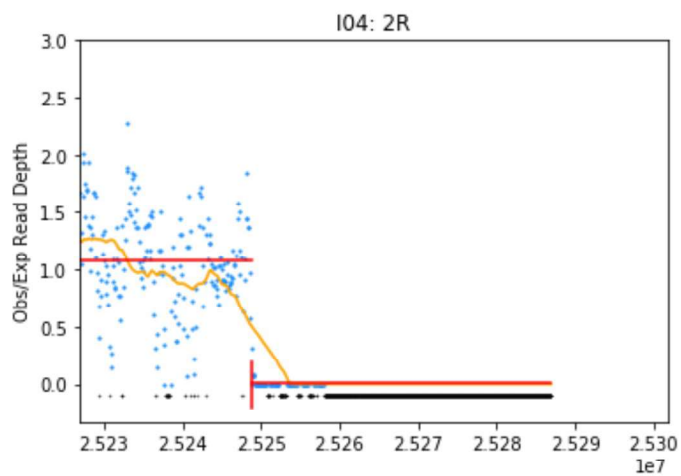

Breakpoint 25248736; Remaining coverage after breakpoint 0.33%

---

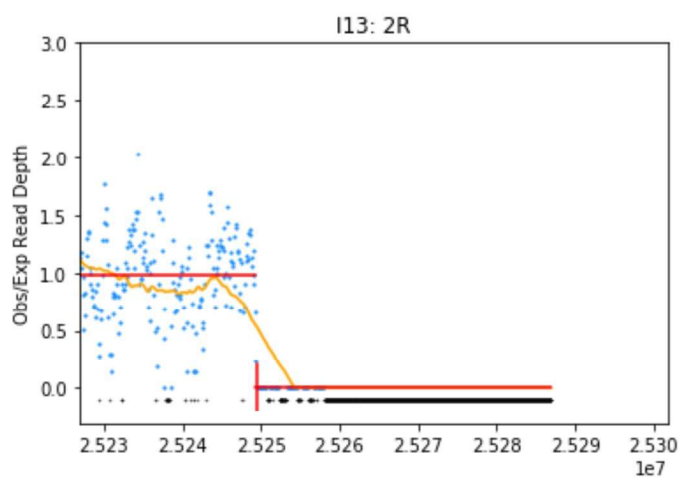

Breakpoint 25249336; Remaining coverage after breakpoint 0.00%

---

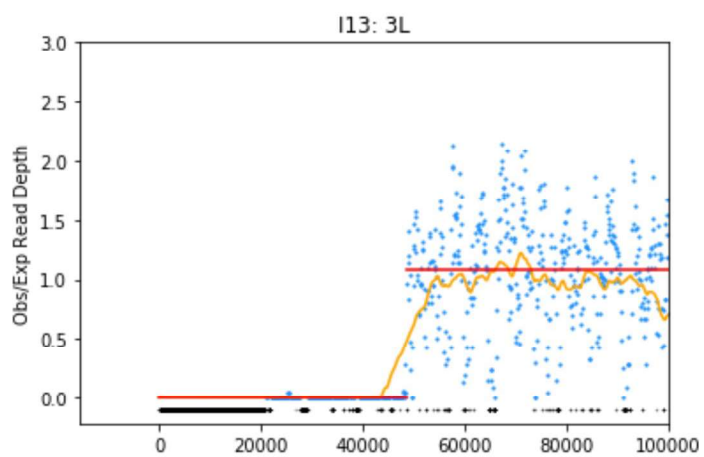

Breakpoint 48700; Remaining coverage after breakpoint 0.67%

---

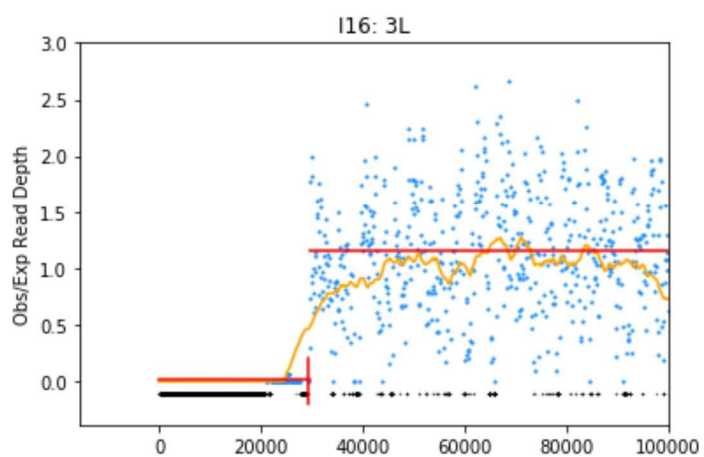

Breakpoint 29600; Remaining coverage after breakpoint 1.76%

---

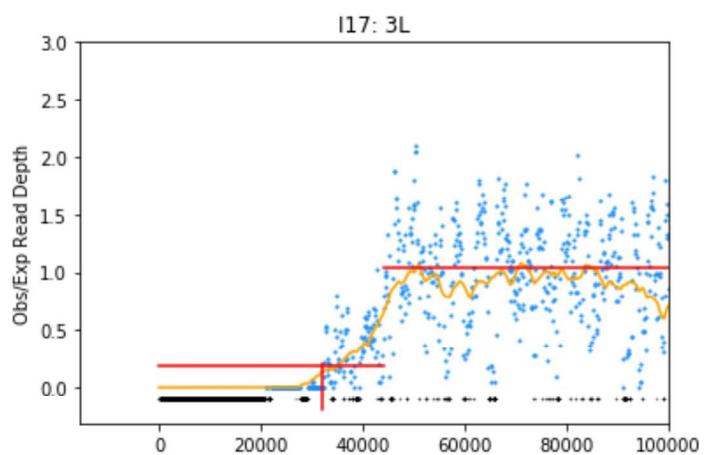

Breakpoint 44100; Remaining coverage after breakpoint 17.31%

---

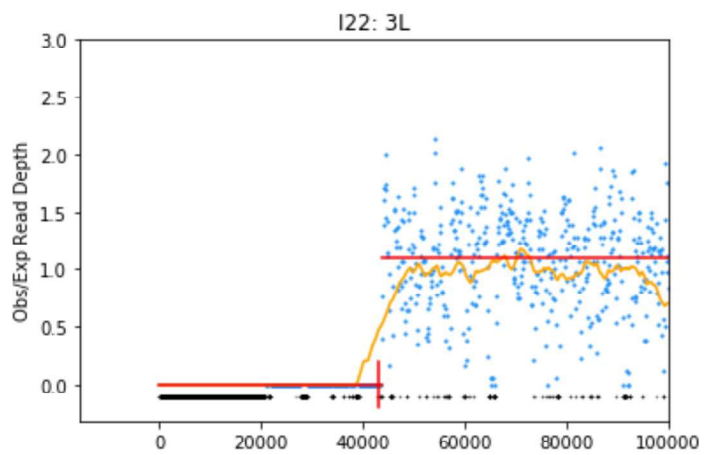

Breakpoint 43900; Remaining coverage after breakpoint 0.59%

---

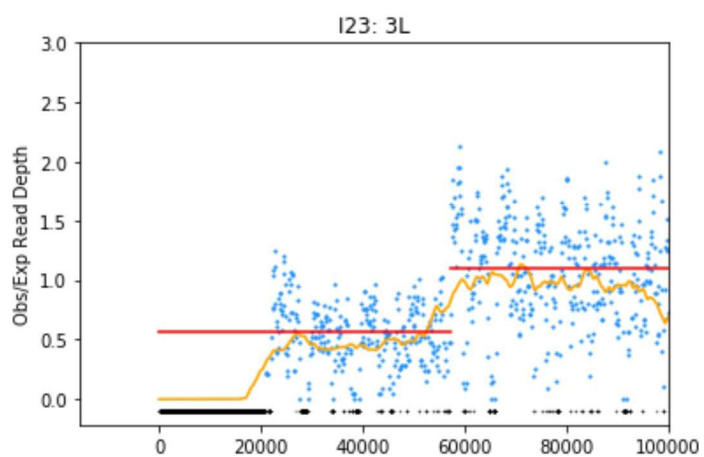

Breakpoint 57300; Remaining coverage after breakpoint 51.02%

---

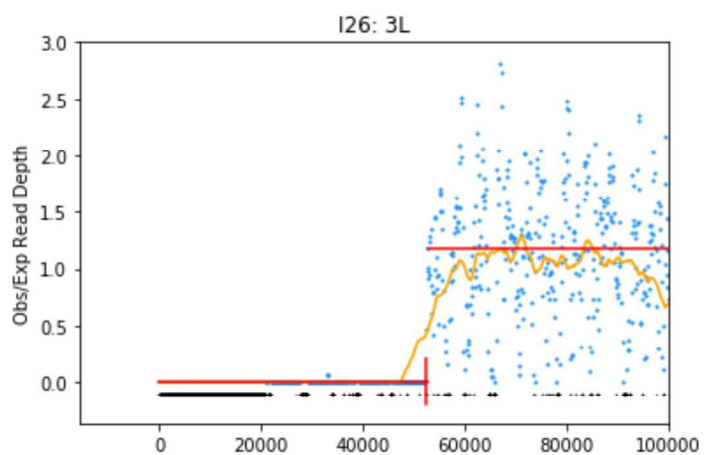

Breakpoint 52600; Remaining coverage after breakpoint 0.56%

---

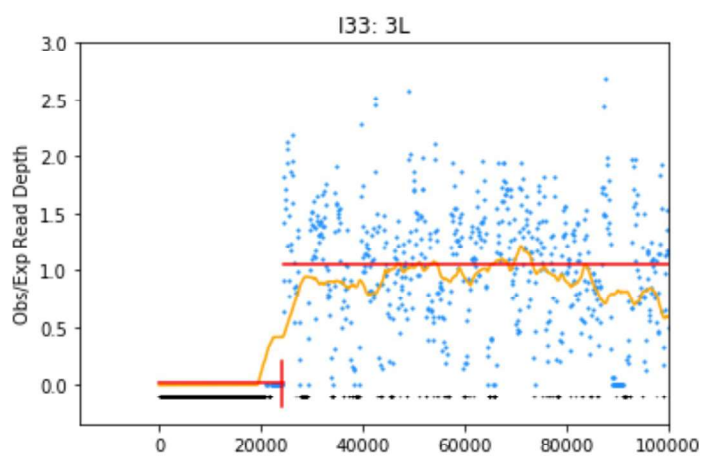



Breakpoint 24300; Remaining coverage after breakpoint 2.21%

---

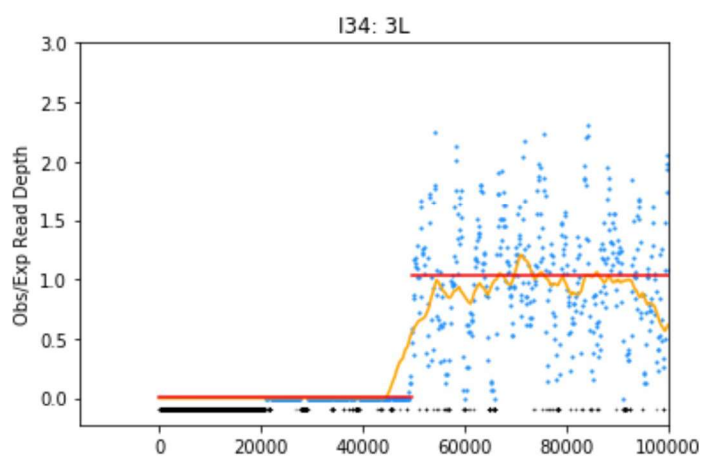

Breakpoint 49600; Remaining coverage after breakpoint 0.66%

---

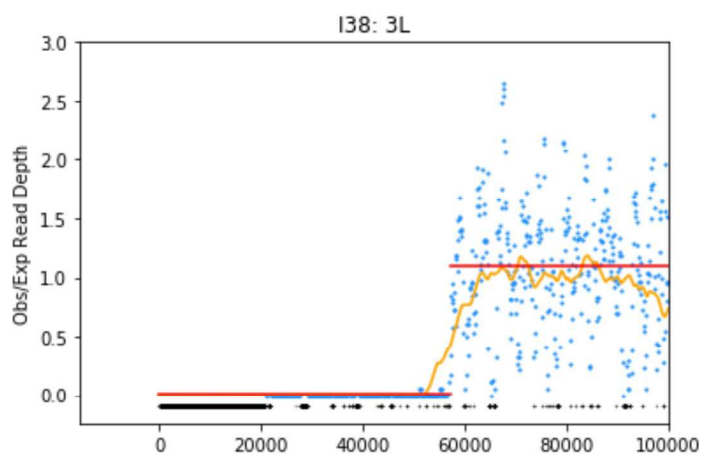

Breakpoint 57300; Remaining coverage after breakpoint 0.57%

---

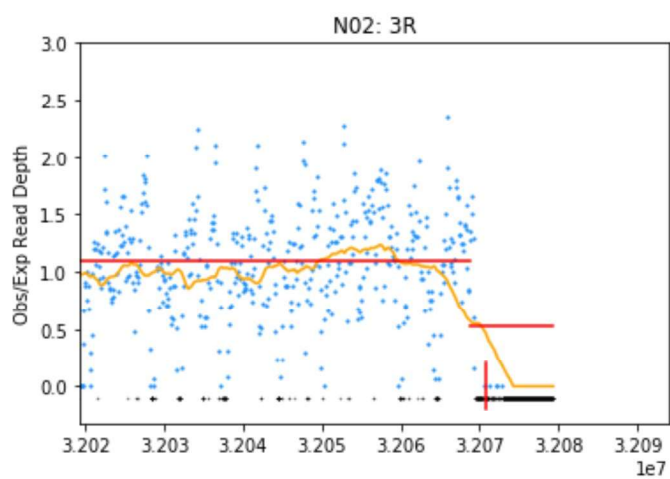

Breakpoint 32068831; Remaining coverage after breakpoint 47.74%

---

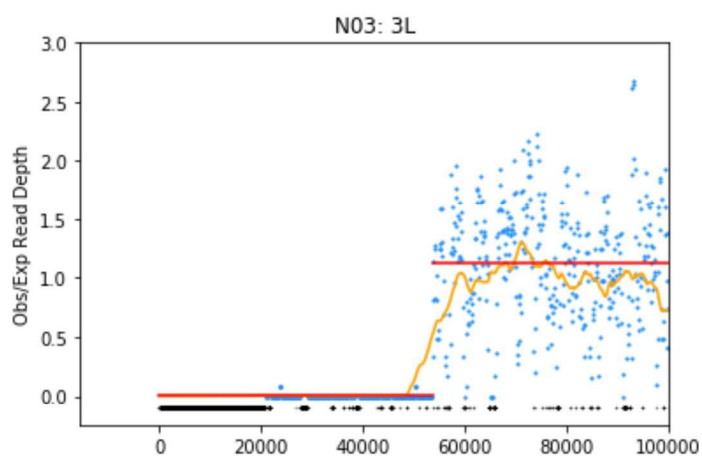

Breakpoint 53800; Remaining coverage after breakpoint 0.58%

---

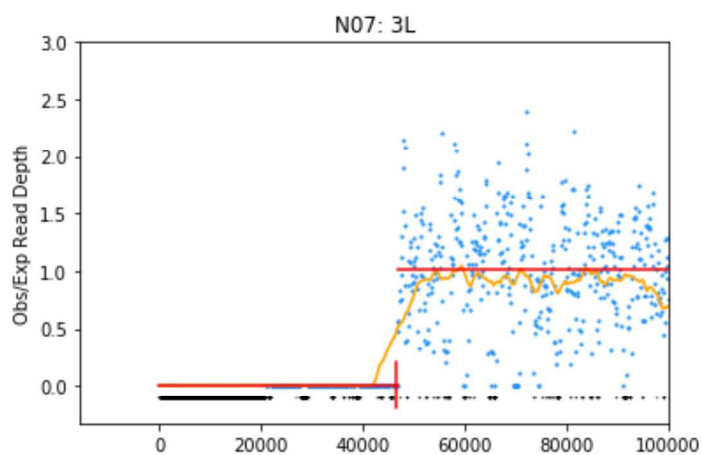

Breakpoint 46900; Remaining coverage after breakpoint 0.50%

---

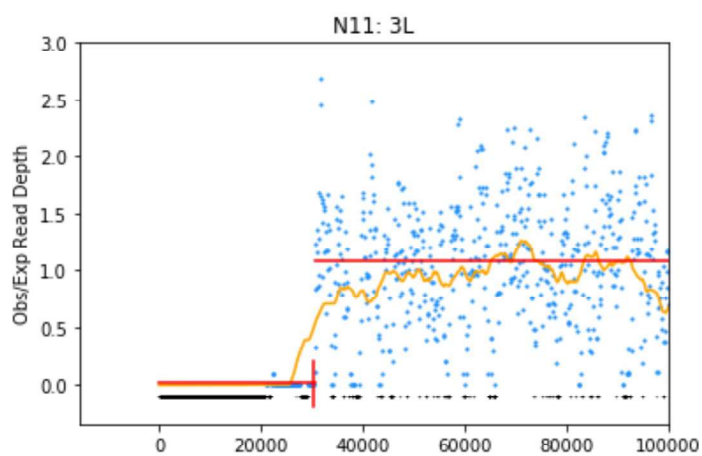

Breakpoint 30700; Remaining coverage after breakpoint 1.95%

---

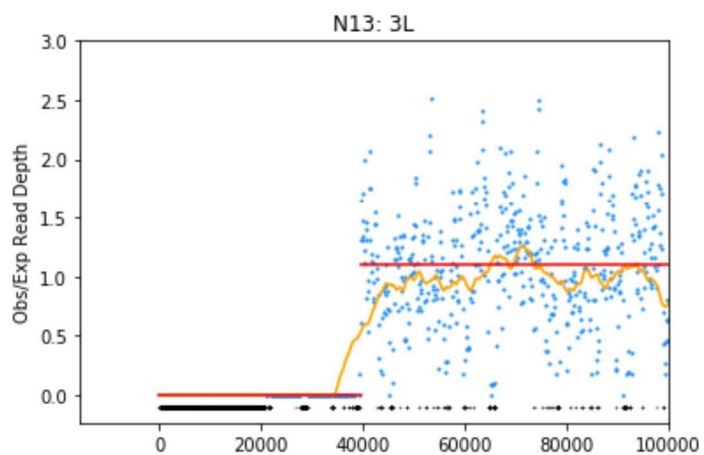

Breakpoint 39500; Remaining coverage after breakpoint 0.50%

---

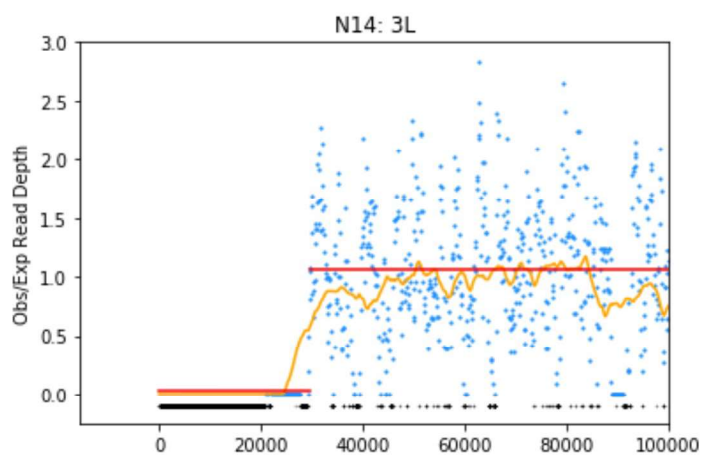

Breakpoint 29500; Remaining coverage after breakpoint 2.24%

---

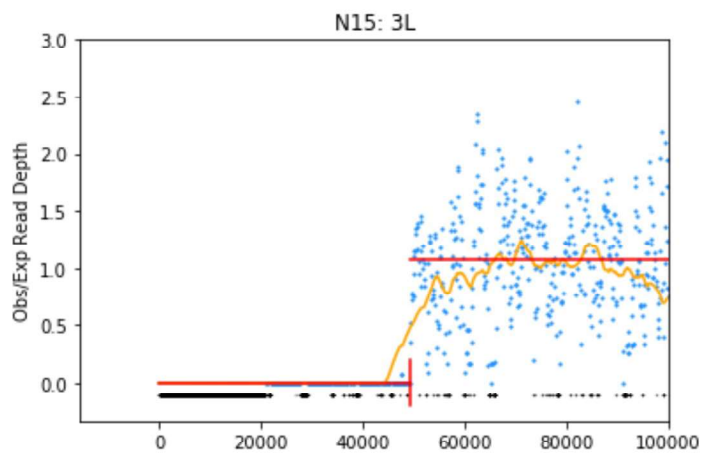

Breakpoint 49400; Remaining coverage after breakpoint 0.42%

---

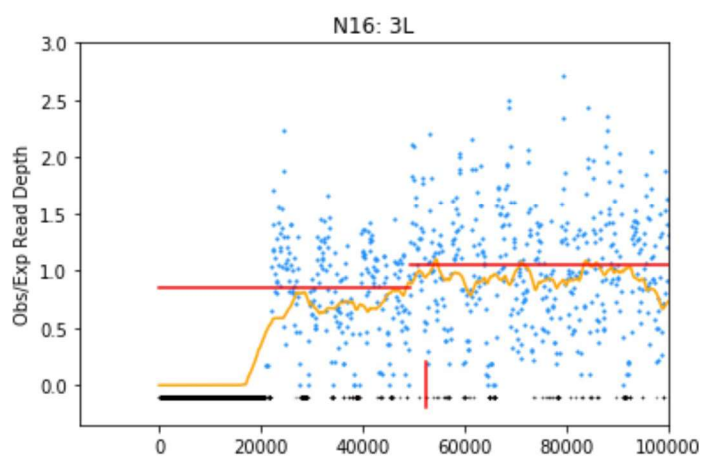

Breakpoint 49400; Remaining coverage after breakpoint 80.02%

---

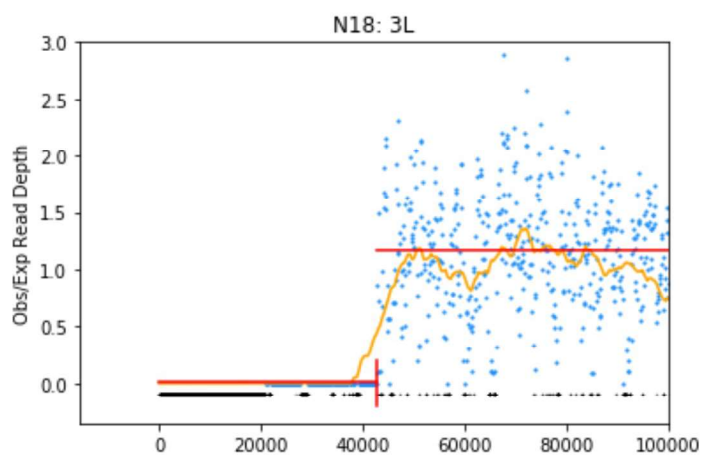

Breakpoint 42800; Remaining coverage after breakpoint 0.47%

---

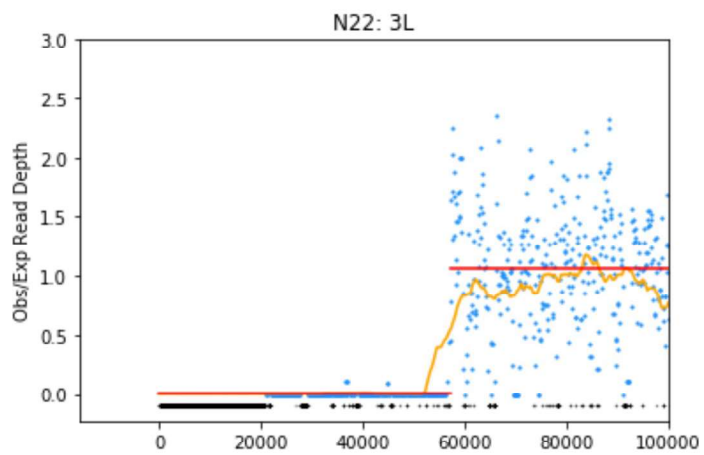

Breakpoint 57200; Remaining coverage after breakpoint 0.75%

---

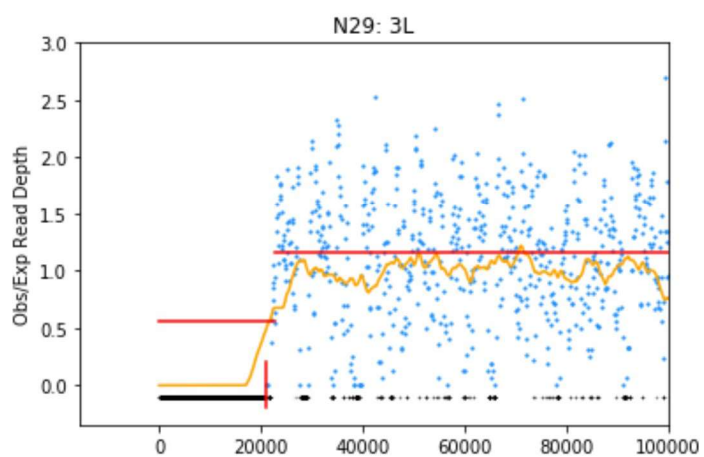

Breakpoint 22800; Remaining coverage after breakpoint 47.93%

---

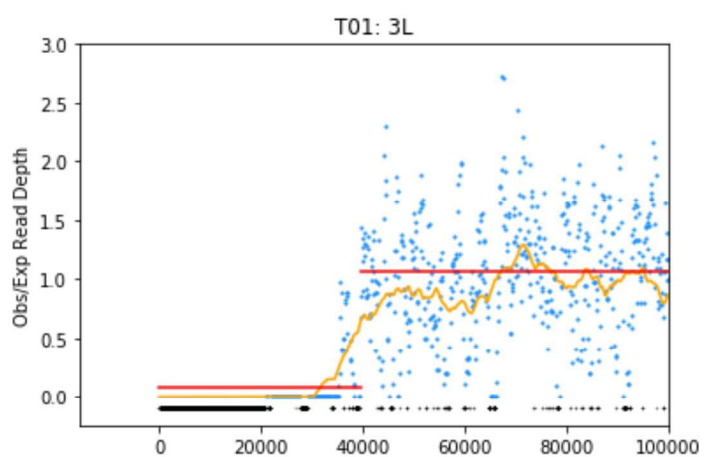

Breakpoint 39500; Remaining coverage after breakpoint 7.92%

---

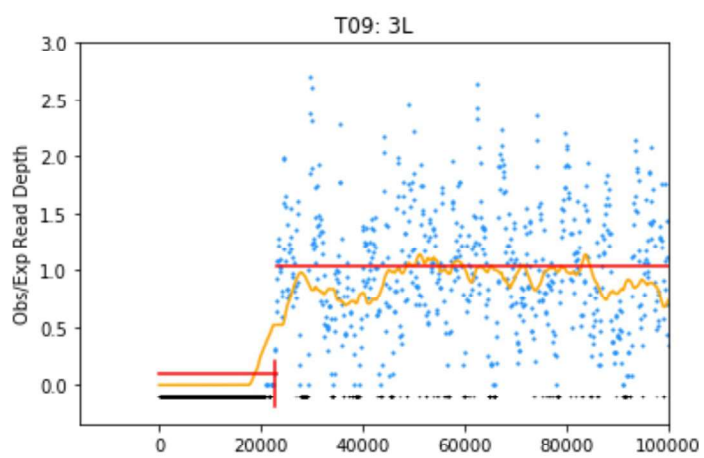

Breakpoint 22900; Remaining coverage after breakpoint 9.82%

---

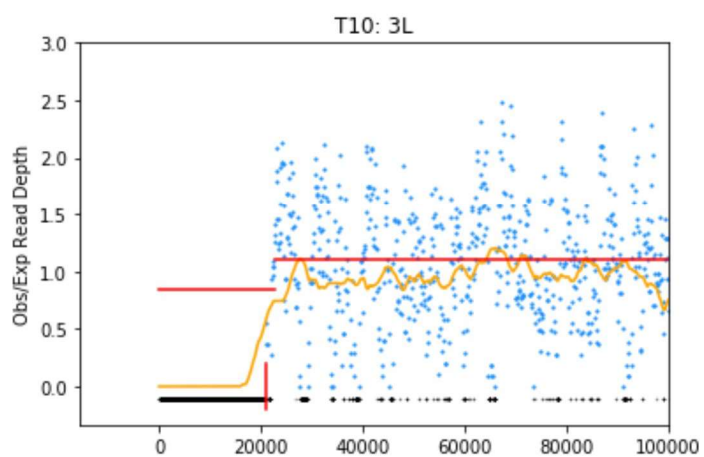

Breakpoint 22700; Remaining coverage after breakpoint 75.51%

---

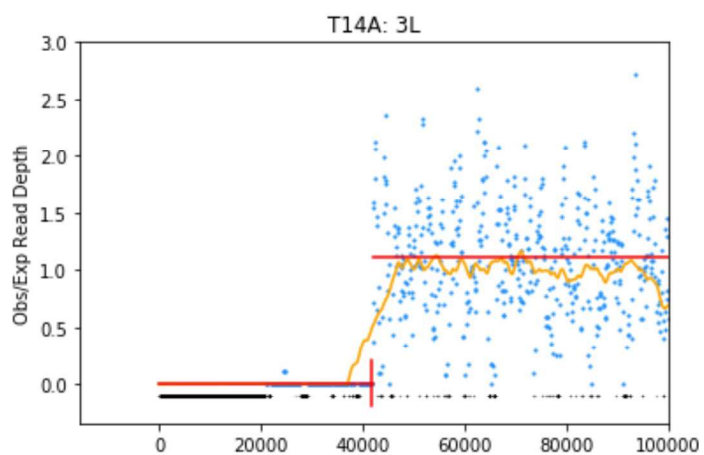

Breakpoint 42000; Remaining coverage after breakpoint 0.76%

---

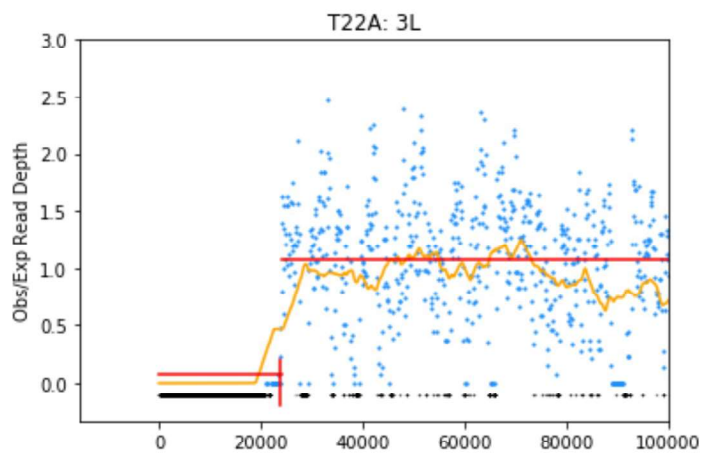

Breakpoint 24000; Remaining coverage after breakpoint 6.66%

---

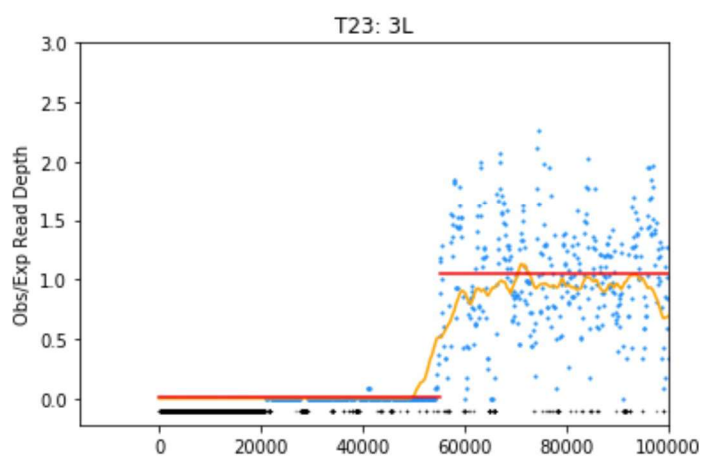

Breakpoint 55000; Remaining coverage after breakpoint 0.70%

---

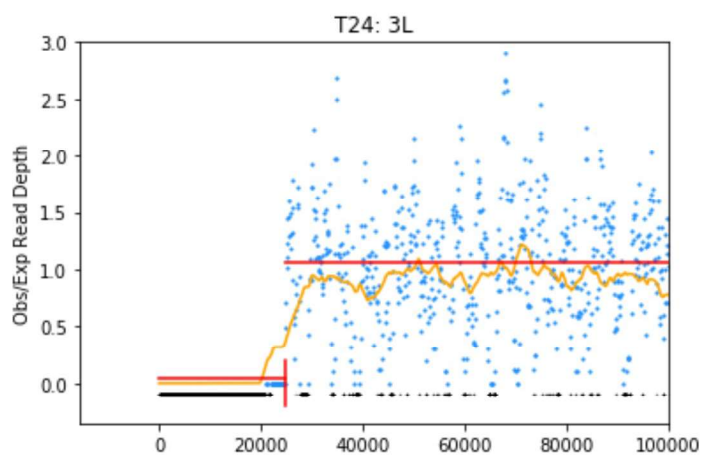

Breakpoint 24900; Remaining coverage after breakpoint 3.44%

---

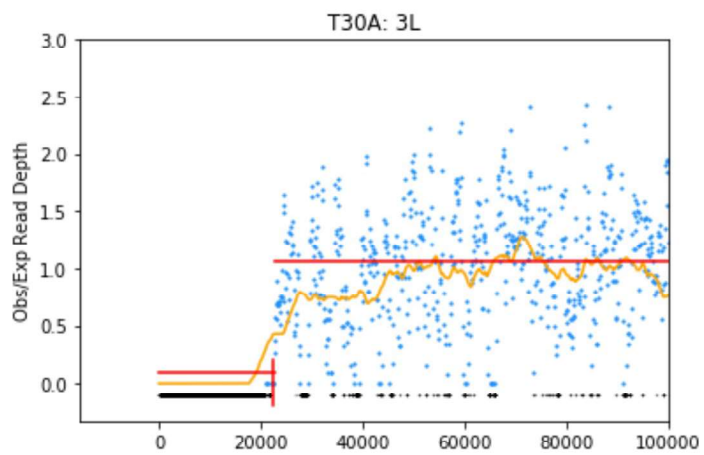

Breakpoint 22800; Remaining coverage after breakpoint 9.57%

---

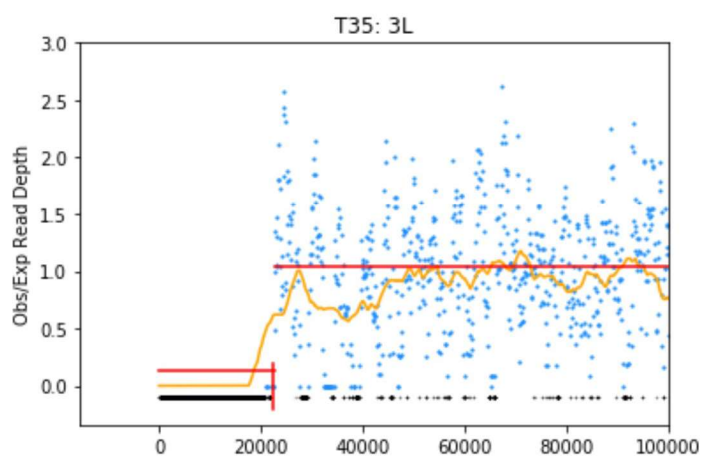

Breakpoint 22700; Remaining coverage after breakpoint 13.04%

---

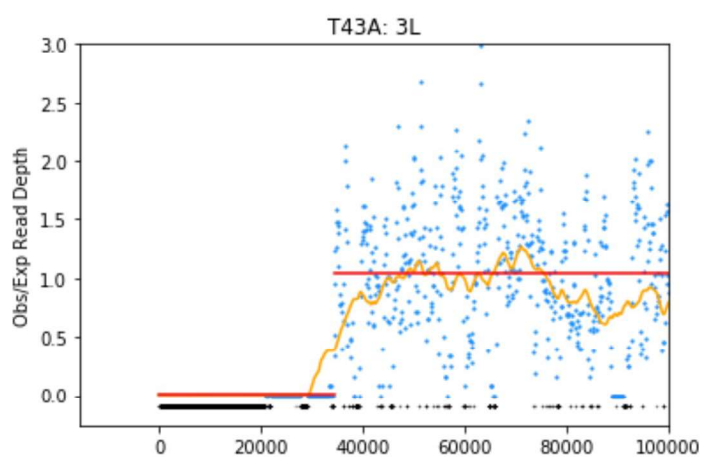

Breakpoint 34400; Remaining coverage after breakpoint 0.98%

---

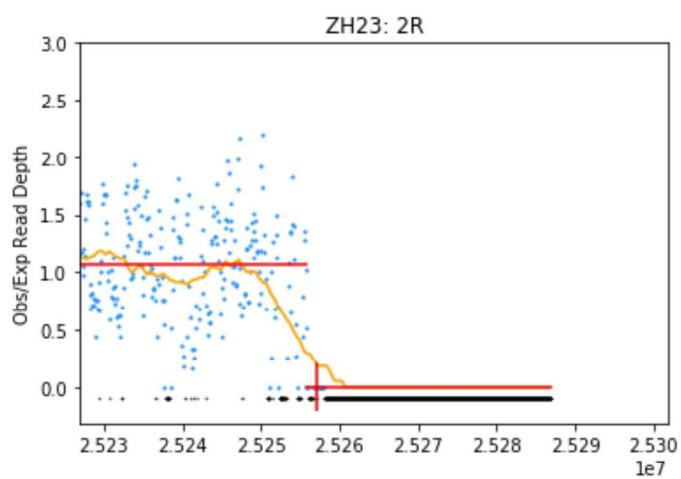



Breakpoint 25255836; Remaining coverage after breakpoint 0.00%

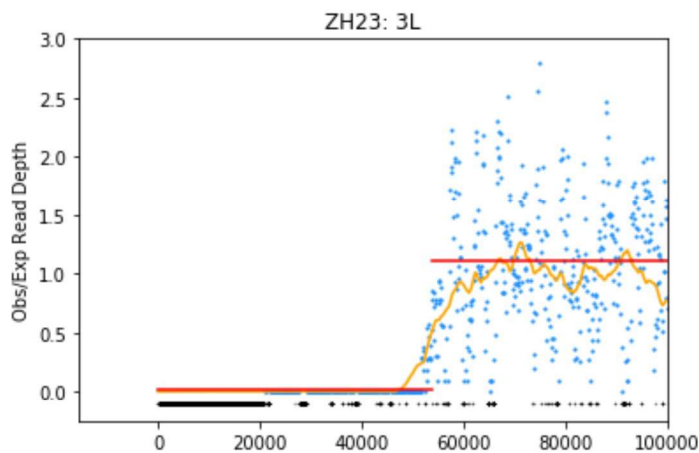

Breakpoint 53600; Remaining coverage after breakpoint 1.83%

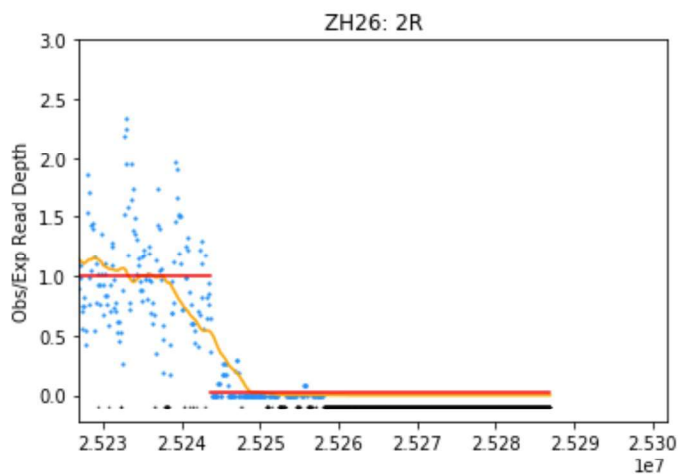

Breakpoint 25243736; Remaining coverage after breakpoint 2.82%

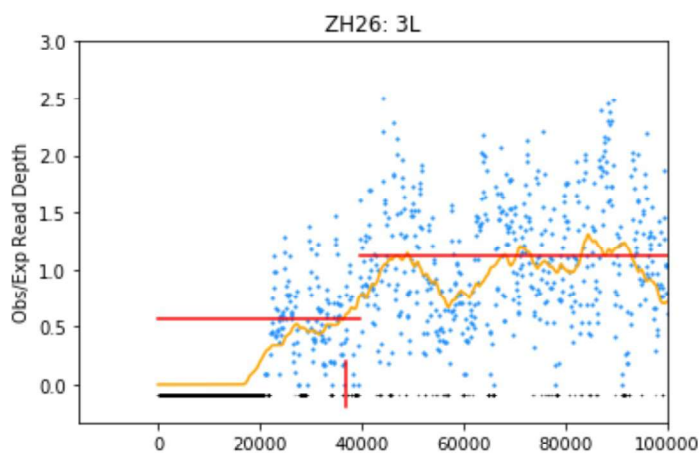

Breakpoint 39500; Remaining coverage after breakpoint 50.67%

---

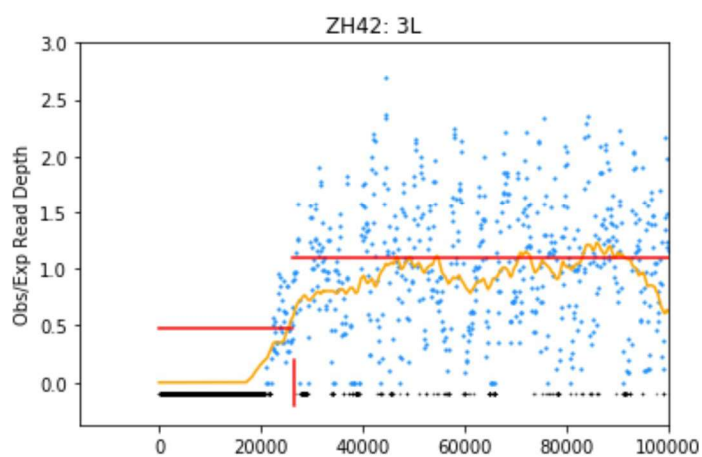

Breakpoint 26300; Remaining coverage after breakpoint 43.58%

---

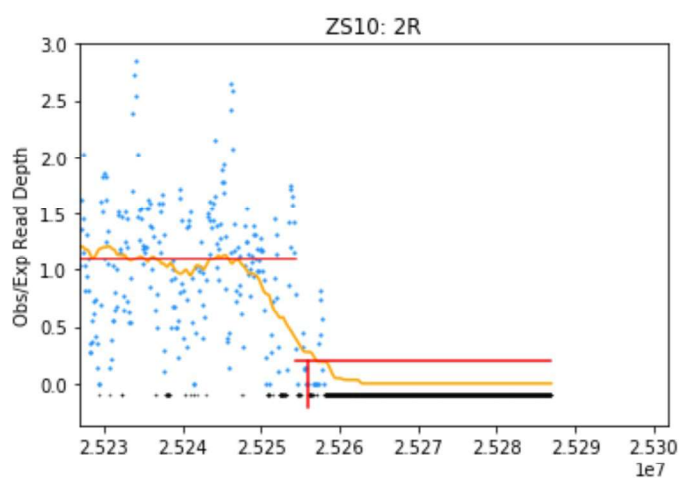

Breakpoint 25254436; Remaining coverage after breakpoint 18.21%

---

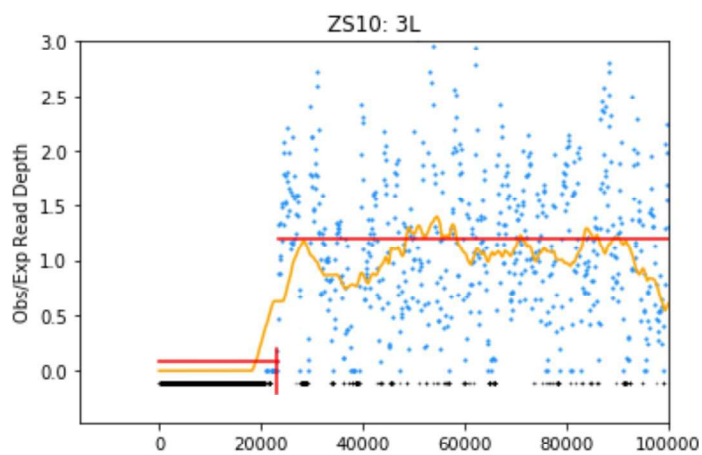

Breakpoint 23400; Remaining coverage after breakpoint 7.54%

---

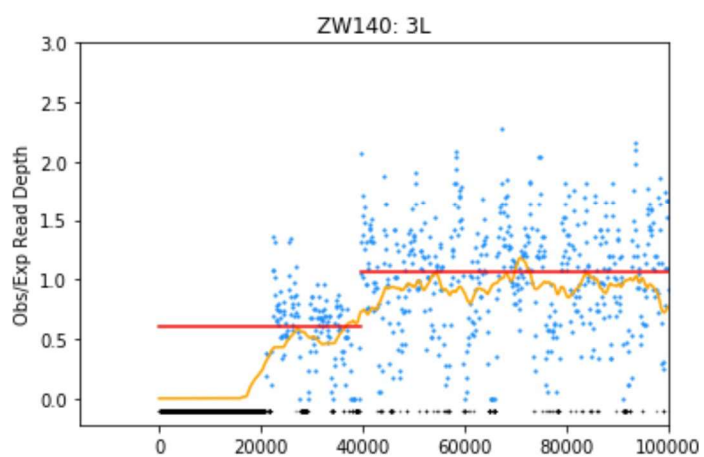

Breakpoint 39500; Remaining coverage after breakpoint 56.65%

---

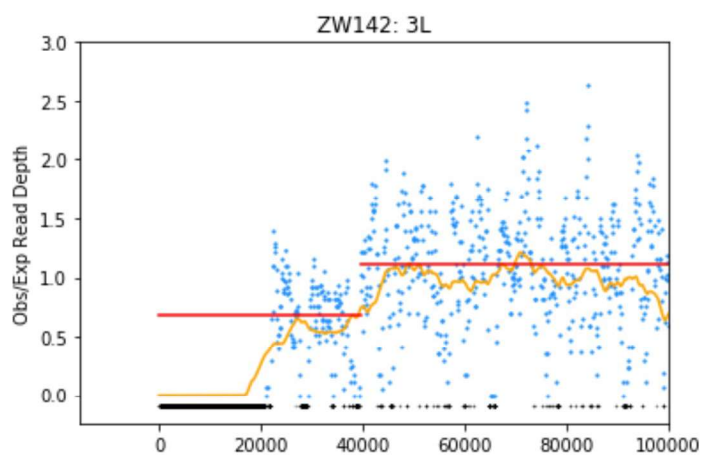

Breakpoint 39500; Remaining coverage after breakpoint 60.73%

---

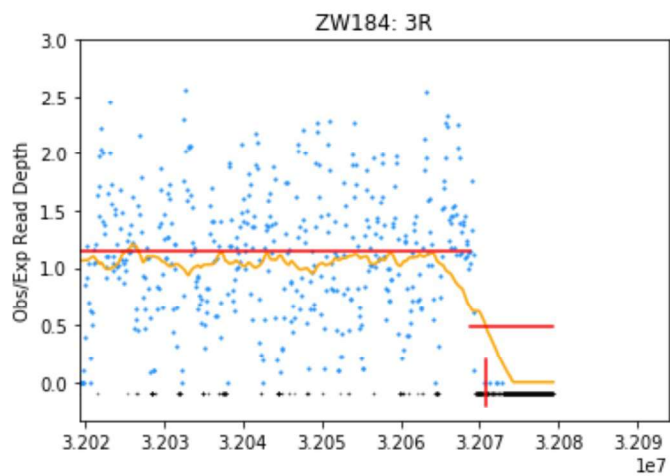

Breakpoint 32068831; Remaining coverage after breakpoint 43.02%

---

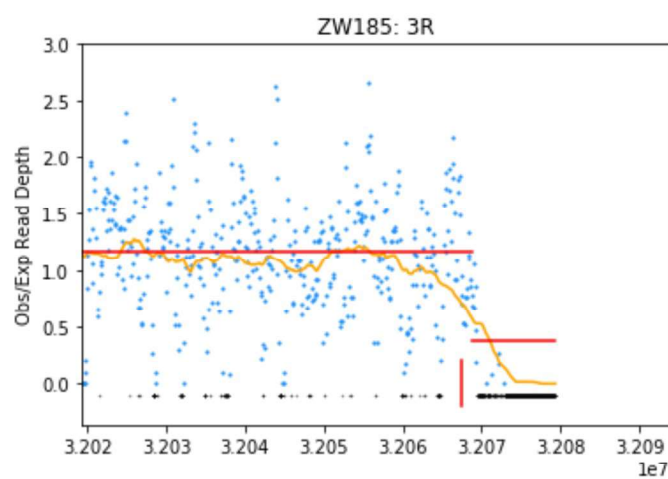

Breakpoint 32068831; Remaining coverage after breakpoint 32.55%

---
